# Supplementary material for: Combined computational and experimental study about the incorporation of phosphorus into the structure of graphene oxide
Source: Royal Society of Chemistry journal article supplement (doi:10.1039/d2cp03666e), 2023-01-01
Supplement: d2cp03666e1.pdf [file d2cp03666e1.pdf]

## Supplementary Information

# Combined computational and experimental study about the incorporation of phosphorus into the structure of graphene oxide

*Tainara L.G. Costa*<sup>1</sup>, *Mariana A. Vieira*<sup>1,4</sup>, *Gustavo R. Gonçalves*<sup>1</sup>, *Daniel F. Cipriano*<sup>1</sup>,  
*Valdemar Lacerda Jr.*<sup>2</sup>, *Arlan S. Gonçalves*<sup>3</sup>, *Wanderlã L. Scopel*<sup>1</sup>, *Abner de Siervo*<sup>5</sup>, *Jair C. C.*  
*Freitas*<sup>1\*</sup>

<sup>1</sup>Laboratory of Carbon and Ceramic Materials, Department of Physics, Federal University of Espírito Santo (UFES), Av. Fernando Ferrari, 514, 29075-910, Vitória, ES, Brazil.

<sup>2</sup>Federal Institute of Education, Science and Technology of Espírito Santo (IFES), Av. Min. Salgado Filho, 1000 , 29106-010, Vila Velha , ES, Brazil.

<sup>3</sup>Laboratory of Organic Chemistry, Department of Chemistry, Federal University of Espírito Santo (UFES), Av. Fernando Ferrari, 514, 29075-910, Vitória, ES, Brazil

<sup>4</sup>Department of Physics, University of Alberta, Edmonton, AB T6G 2E1, Canada

<sup>5</sup>Department of Applied Physics - State University of Campinas (UNICAMP), St. Sergio Buarque de Holanda, 777, 13083-859, Campinas, Brazil

\*Corresponding authors: [guerratainara@gmail.com](mailto:guerratainara@gmail.com); [jairccfreitas@yahoo.com.br](mailto:jairccfreitas@yahoo.com.br)

## Details about the characterization methods

### *Solid-state NMR experiments*

Solid-state NMR experiments were conducted at room temperature in a Varian/Agilent VNMR 400 MHz spectrometer (operating at a magnetic field of 9.4 T) using a triple-resonance probehead; the powdered samples were packed into 4 mm diameter zirconia rotors for magic angle spinning (MAS) experiments at the frequency of 14 kHz. For  $^{13}\text{C}$  nuclei (NMR frequency of 100.52 MHz), the pulse sequence comprised a  $\pi/2$  pulse (4.3  $\mu\text{s}$ ) immediately followed by a pair of  $\pi$  pulses (8.6  $\mu\text{s}$ ), in order to avoid probe background signals, and the subsequent detection of the free induction decay (FID); the recycle delay was 15 s and the spectral window was 250 kHz; the spectra were obtained by Fourier transform of the FIDs, after accumulation of ca. 4000 transients; the  $^{13}\text{C}$  chemical shifts were referenced to tetramethylsilane (TMS), using hexamethylbenzene as a secondary reference (signal at 17.3 ppm). For  $^{31}\text{P}$  nuclei (NMR frequency of 161.81 MHz), the single pulse experiments were performed using a  $\pi/2$  pulse with duration of 4.0  $\mu\text{s}$ , a recycle delay of 60 s (adjusted to avoid saturation issues), a spectral window of 100 kHz and ca. 500 scans; the  $^{31}\text{P}$  chemical shifts were referenced to a 85 wt. % aqueous  $\text{H}_3\text{PO}_4$  solution, using  $\text{NH}_4\text{H}_2\text{PO}_4$  as the secondary reference (signal at 0.9 ppm).

### *XPS experiments*

The samples for the XPS experiments were glued to a Mo-plate sample-holder with conductive carbon tape. The samples were degassed in a load-lock chamber for 12 h before transferring to the XPS chamber. The obtained data were fitted assuming Shirley-type background and Lorentzian

peaks numerically convoluted with a normalized Gaussian function with a fixed full-width at half maximum of  $\sim 0.9$  eV that describes the instrumental broadening. The atomic concentrations were obtained from the XPS spectra assuming that the analysed samples are primarily carbon-based materials and are chemically homogeneous. As the inelastic mean free path (IMFP) of photoelectrons is different for distinct chemical elements, the IMFP for each core-level peak was calculated using the TPP-2M formula<sup>1</sup>, as provided in the software Quases-IMFP<sup>2</sup>. The TPP-2M formula has been proven to be an excellent approximation for IMFP calculations for homogenous materials. Having this information, as well as the analyser transmission and photoemission cross-sections<sup>3</sup> the atomic concentrations (at. %) were determined using the method reported by Wagner et al.<sup>4</sup> Finally, the atomic concentrations were easily converted to weight concentrations (wt. %), as reported in Table 2 of the main text.

### **Details about the computational methods**

The DFT calculations were carried out using the Quantum Espresso package (version 5.1) using periodic boundary conditions.<sup>5</sup> The exchange-correlation term was described within the generalized gradient approximation (GGA), using the Perdew-Burke-Ernzerhof (PBE) scheme.<sup>6</sup> The Kohn-Sham orbitals were expanded in a plane wave basis set with an energy cutoff of 1088 eV.<sup>7,8</sup> The van der Waals interaction was taken into account following the semi-empirical approach described by Grimme et al.<sup>9</sup> The supercells were constructed with a vacuum region of 25 Å along the direction perpendicular to the graphene plane. All the structures were relaxed keeping the supercell lattice parameter fix until the atomic forces were lower than 0.01 eV /Å.<sup>7,8</sup> The NMR spectral parameters were determined using the GIPAW approach,<sup>10</sup> also implemented in Quantum

Espresso,<sup>5</sup> which is based on an extension of the projector augmented-wave (PAW) method proposed by Blöchl.<sup>11,12</sup>

## Results

### Elemental P contents

**Table S1.** Bulk elemental P and S contents obtained by XRF for all produced samples.

| Sample    | H <sub>2</sub> SO <sub>4</sub><br>volume<br>(mL) | H <sub>3</sub> PO <sub>4</sub><br>volume<br>(mL) | P content<br>(wt. %) | S content<br>(wt. %) |
|-----------|--------------------------------------------------|--------------------------------------------------|----------------------|----------------------|
| GO 120:20 | 120                                              | 20                                               | 0.53(3)              | 11.3                 |
| GO 100:40 | 100                                              | 40                                               | 0.90(3)              | 10.5                 |
| GO 90:50  | 90                                               | 50                                               | 1.06 (2)             | 4.36                 |
| GO 80:60  | 80                                               | 60                                               | 0.97(1)              | 4.51                 |
| GO 70:70  | 70                                               | 70                                               | 1.68(3)              | 7.36                 |
| GO 60:80  | 60                                               | 80                                               | 2.86(3)              | 2.10                 |
| GO 50:90  | 50                                               | 90                                               | 5.50(2)              | 3.22                 |
| GO 40:100 | 40                                               | 100                                              | 5.01(2)              | 2.24                 |
| GO 20:120 | 20                                               | 120                                              | 4.94(2)              | 0.54                 |
| GO 0:140  | 0                                                | 140                                              | 0.96(1)              | 0.009                |

**Table S2.** Surface elemental contents obtained by XPS for a set of P/GO hybrids.

| <b>Contents<br/>(wt. %)</b> | <b>GO 40:100</b> | <b>GO 50:90</b> | <b>GO 60:80</b> | <b>GO 70:70</b> | <b>GO 80:60</b> | <b>GO 90:50</b> | <b>GO 100:40</b> |
|-----------------------------|------------------|-----------------|-----------------|-----------------|-----------------|-----------------|------------------|
| <b>C</b>                    | 60.5             | 52.4            | 57.4            | 59.1            | 69.0            | 56.0            | 54.0             |
| <b>O</b>                    | 32.5             | 41.1            | 39.0            | 38.3            | 27.7            | 41.0            | 41.4             |
| <b>P</b>                    | 3.6              | 4.9             | 2.6             | 1.6             | 1.0             | 0.9             | 0.7              |
| <b>F</b>                    | 2.0              | 0.0             | 0.0             | 0.0             | 0.0             | 0.0             | 0.0              |
| <b>S</b>                    | 1.2              | 1.6             | 1.1             | 1.0             | 2.3             | 2.1             | 3.9              |

## XPS spectra

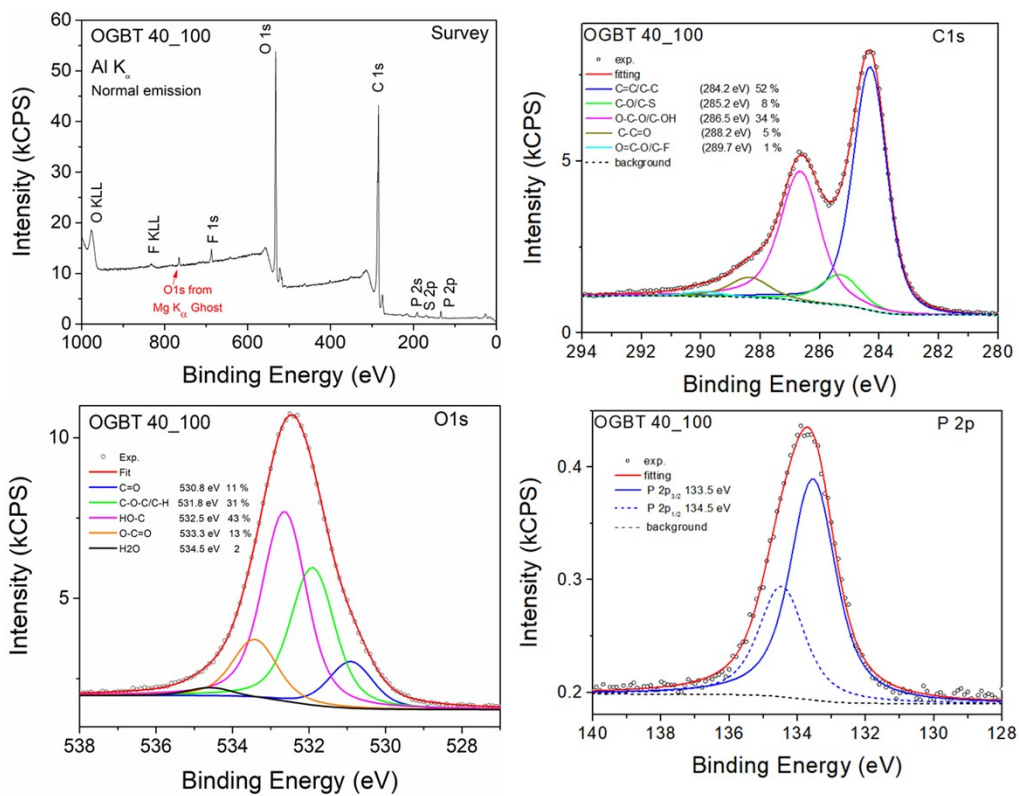

**Figure S1 (a):** Survey and high-resolution C 1s, O 1s and P 2p XPS spectra obtained for the GO 40:100 sample.

GO 50:90

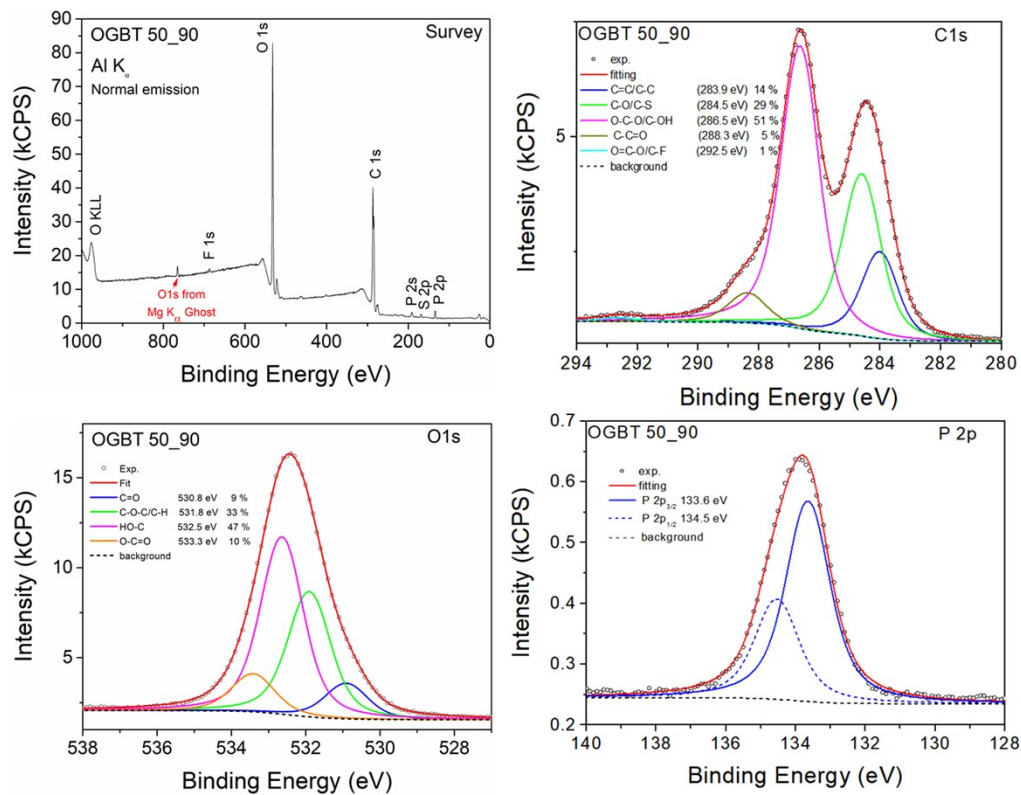

**Figure S1 (b):** Survey and high-resolution C 1s, O 1s and P 2p XPS spectra obtained for the GO 50:90 sample.



GO 60:80

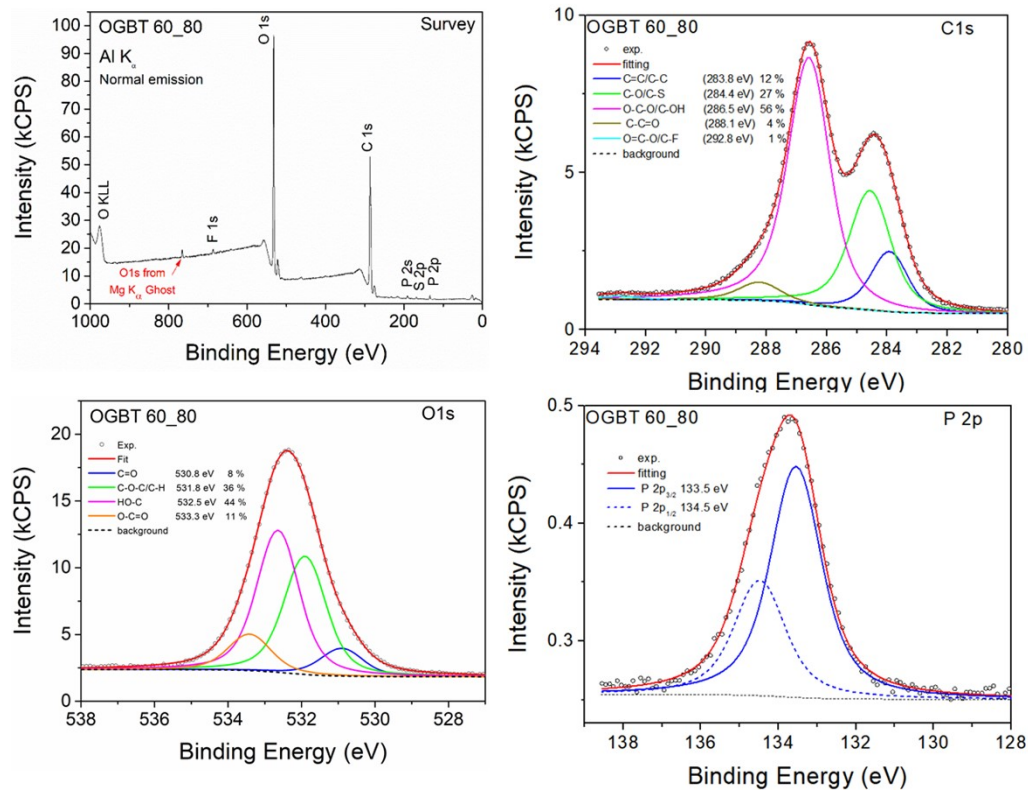

**Figure S1 (c):** Survey and high-resolution C 1s, O 1s and P 2p XPS spectra obtained for the GO 60:80 sample.

GO 70:70

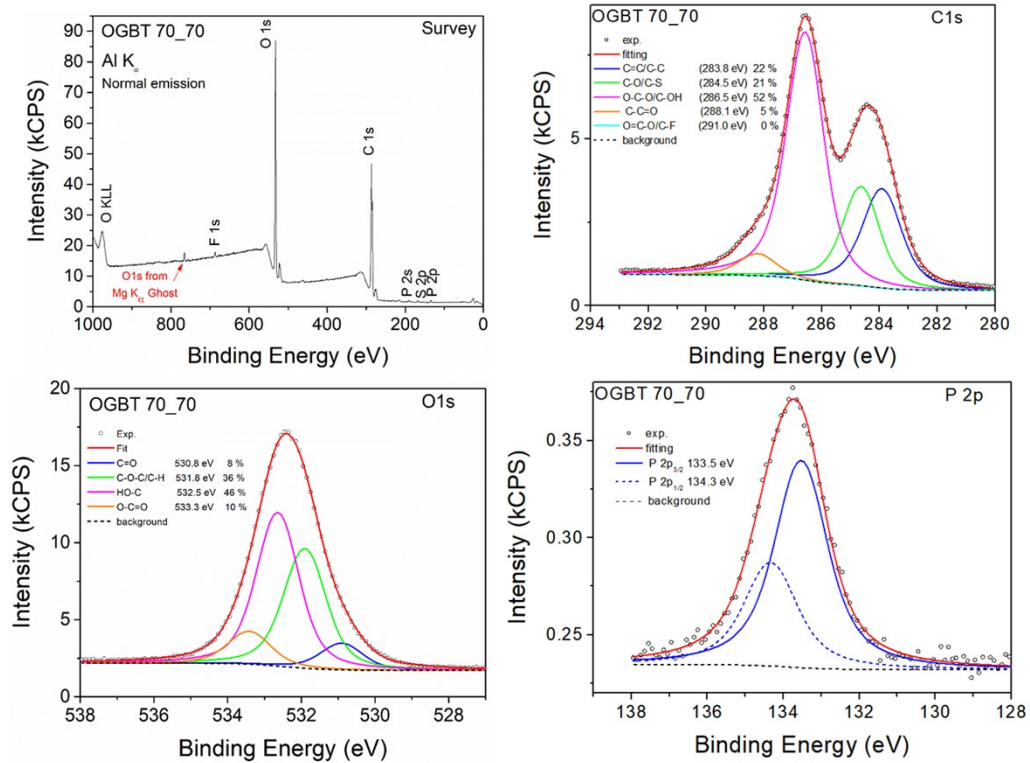

Figure S1 (d): Survey and high-resolution C 1s, O 1s and P 2p XPS spectra obtained for the GO 70:70 sample.

GO 80:60

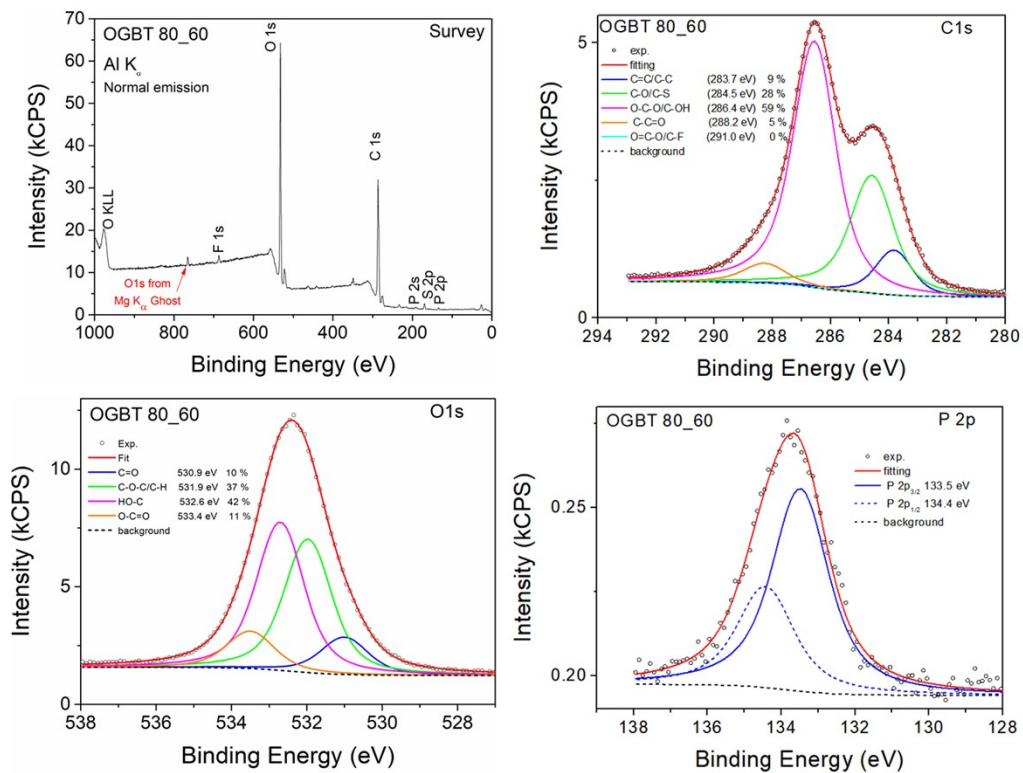

Figure S1 (e): Survey and high-resolution C 1s, O 1s and P 2p XPS spectra obtained for the GO 80:60 sample.

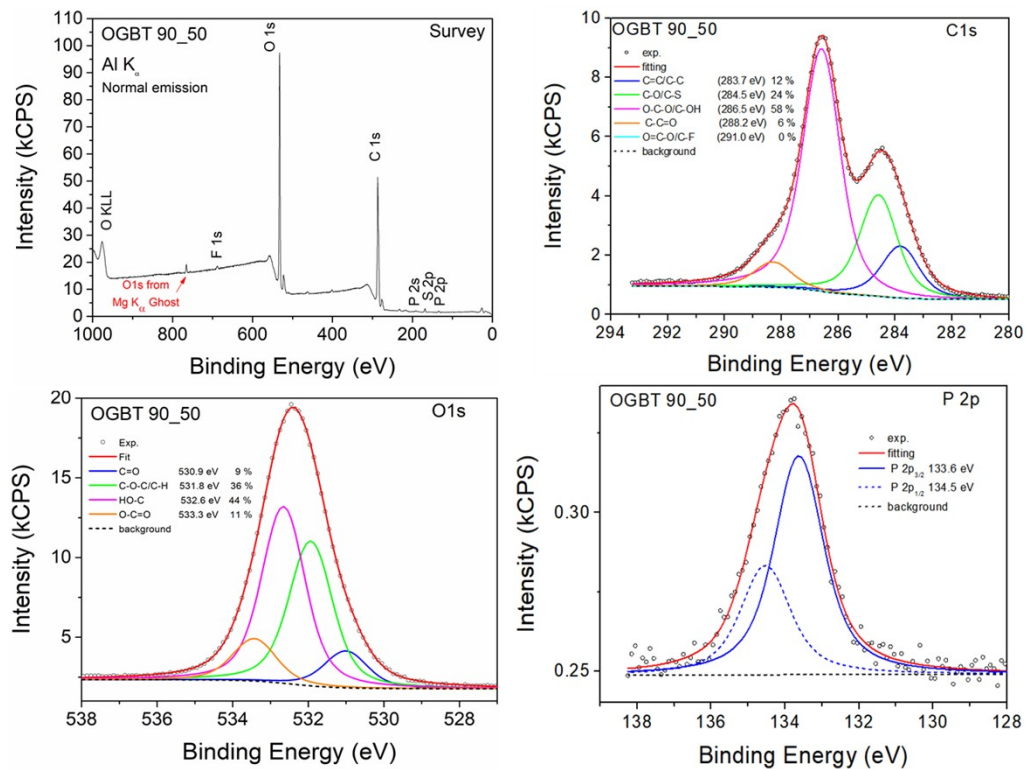

**Figure S1 (f):** Survey and high-resolution C 1s, O 1s and P 2p XPS spectra obtained for the GO 90:50 sample.

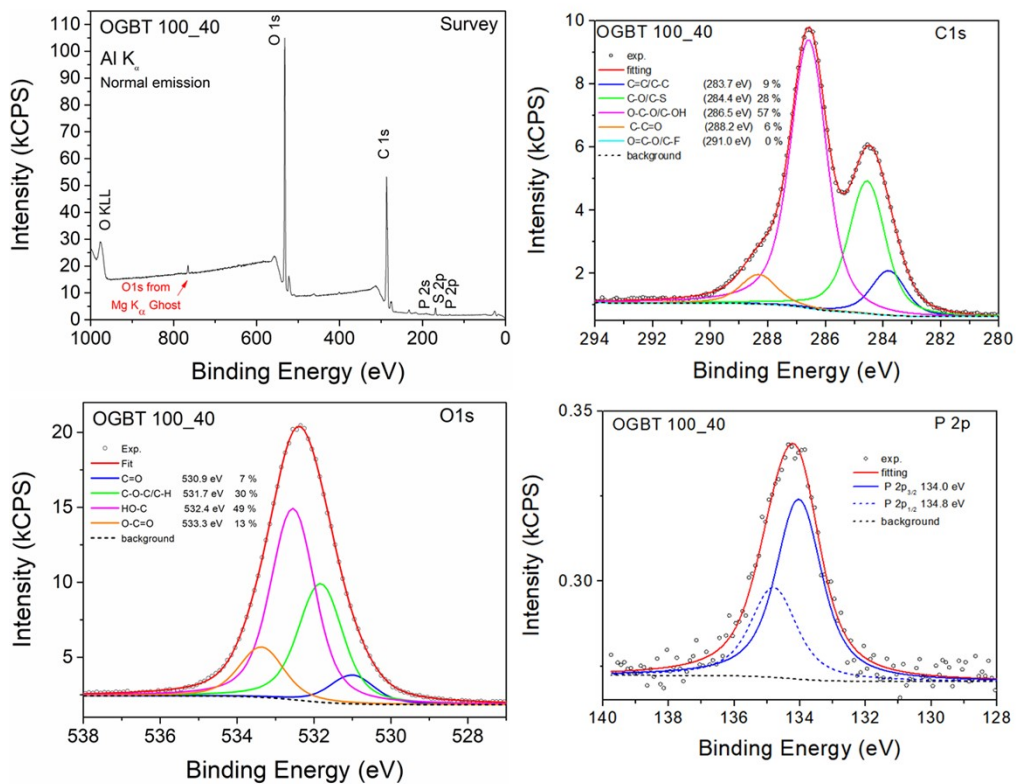

**Figure S1 (g):** Survey and high-resolution C 1s, O 1s and P 2p XPS spectra obtained for the GO 100:40 sample

## XRD results

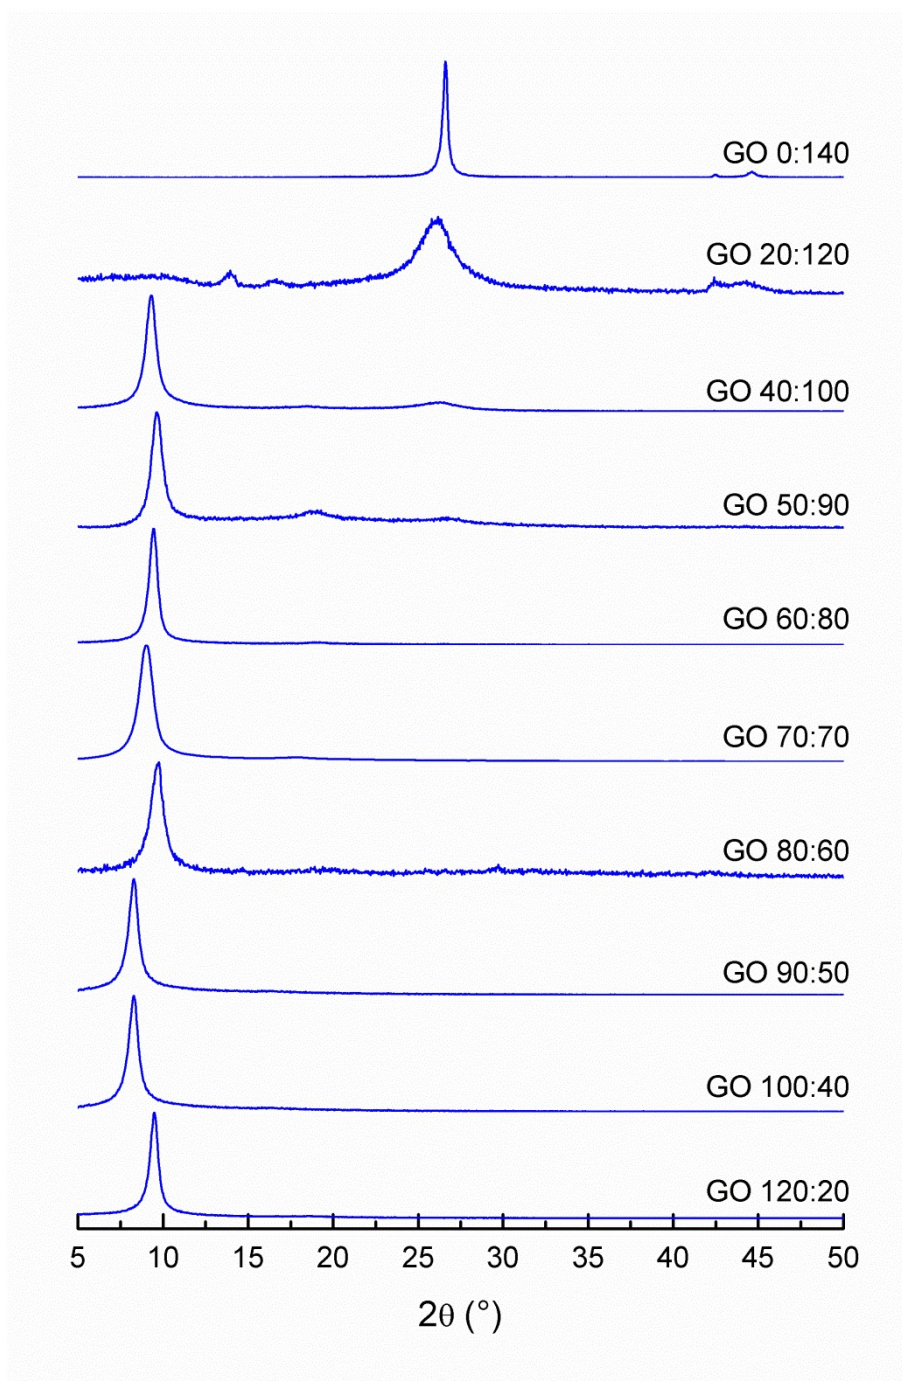

**Figure S2.** XRD patterns of the synthesized P/GO hybrids.



## TG results

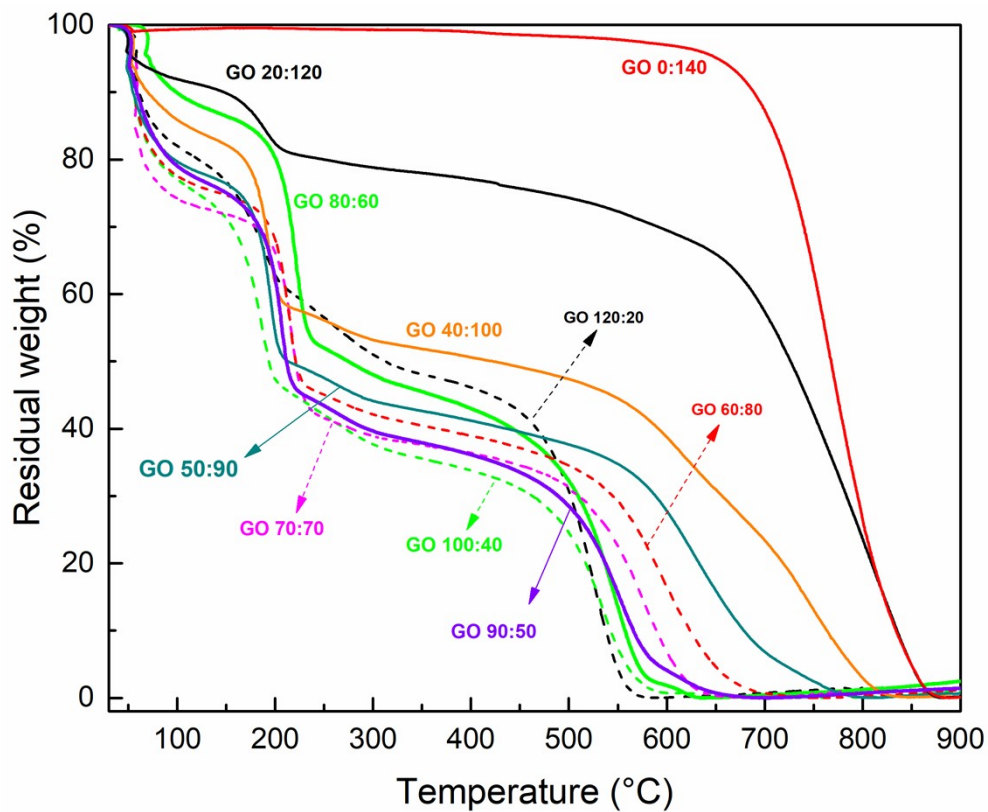

**Figure S3.** TG curves recorded under O<sub>2</sub> flow for the synthesized P/GO hybrids.

## Solid-state $^{13}\text{C}$ NMR results

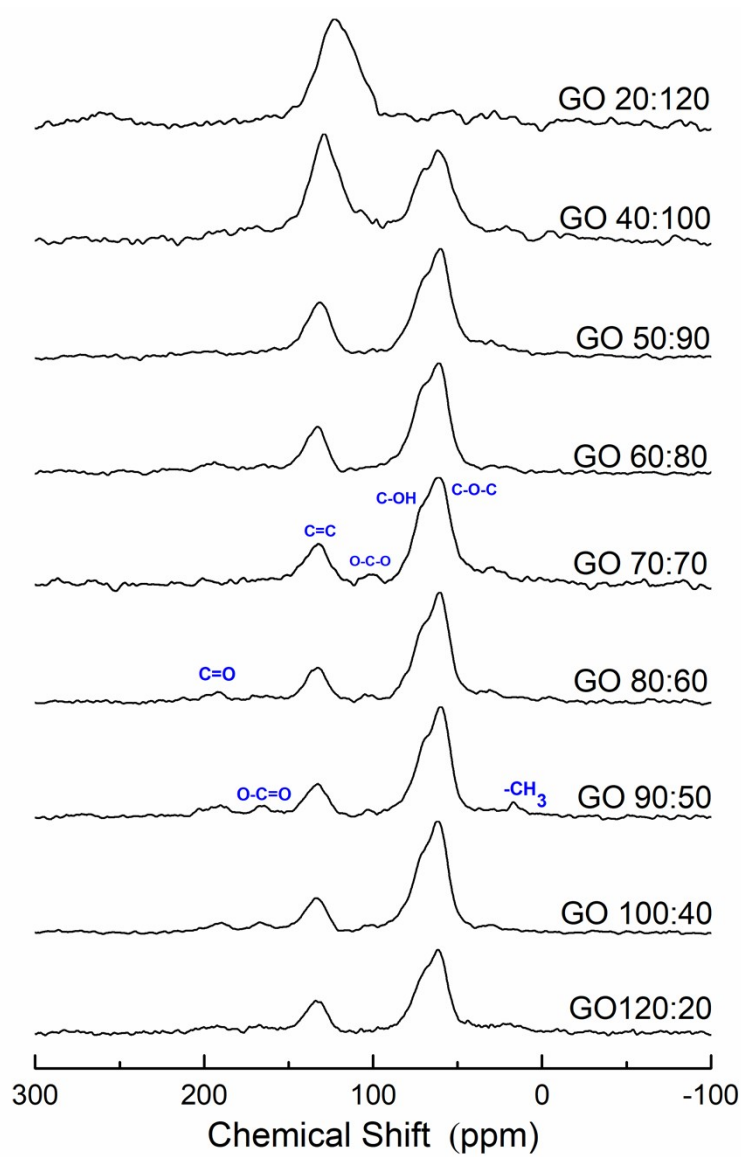

**Figure S4.** Solid-state  $^{13}\text{C}$  NMR spectra of the whole set of synthesized P/GO hybrids.



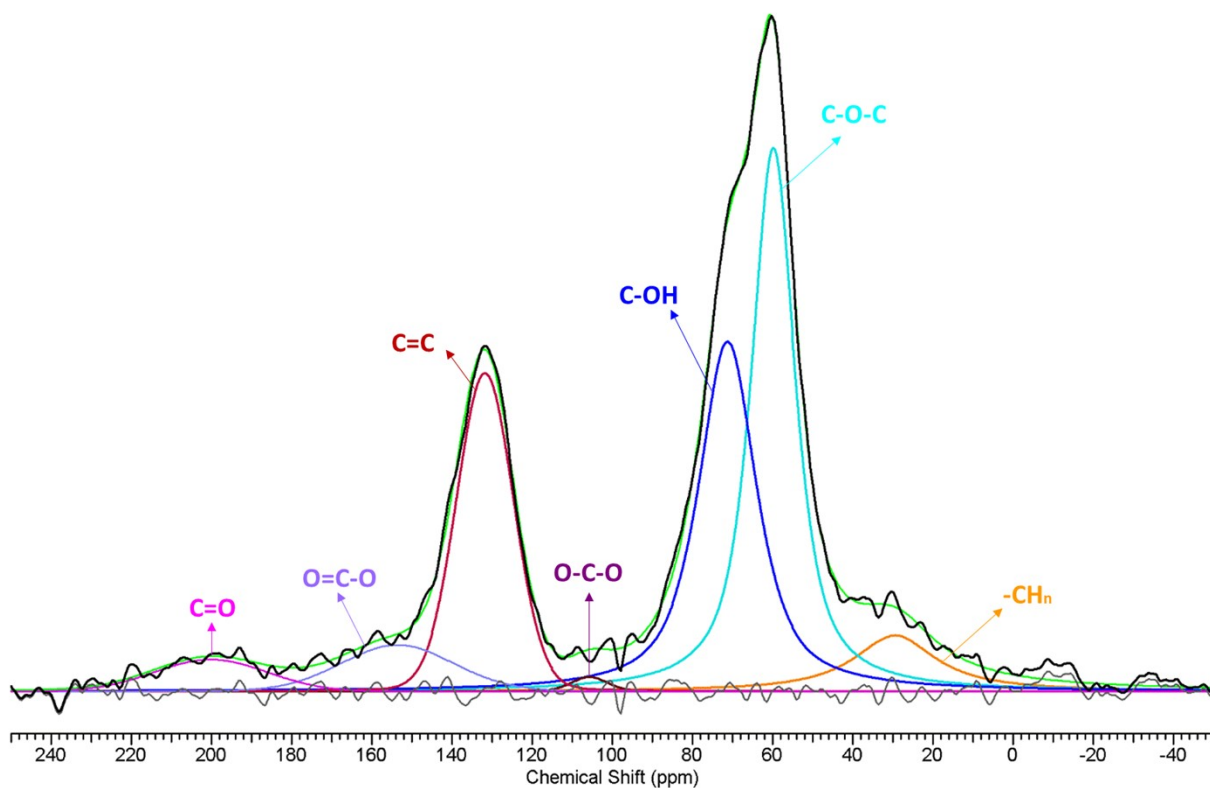

**Figure S5.** Solid-state  $^{13}\text{C}$  NMR spectrum obtained for the GO 50:90 hybrid. The black line is the experimental spectrum, the green line is the fitted spectrum, the gray line indicates the residual (difference between experimental and fitted spectra) and the other colored lines correspond to the components used in the spectral deconvolution, associated with the indicated groups.

## Solid-state $^{31}\text{P}$ NMR results

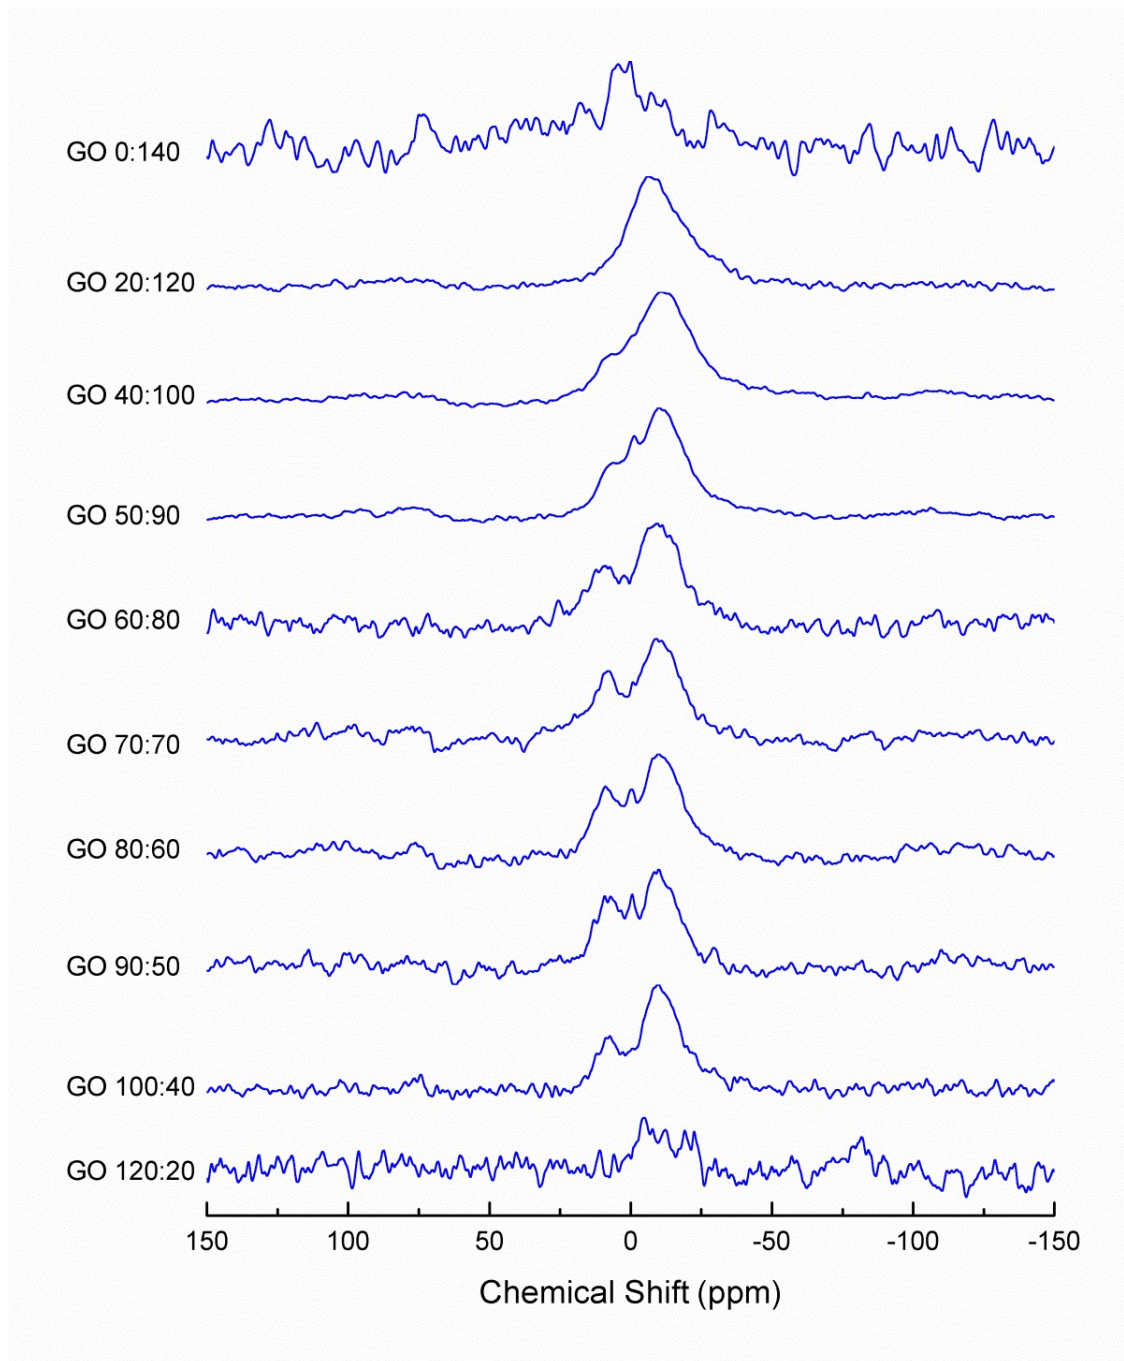

**Figure S6.** Solid-state  $^{31}\text{P}$  NMR spectra of the whole set of synthesized P/GO hybrids.

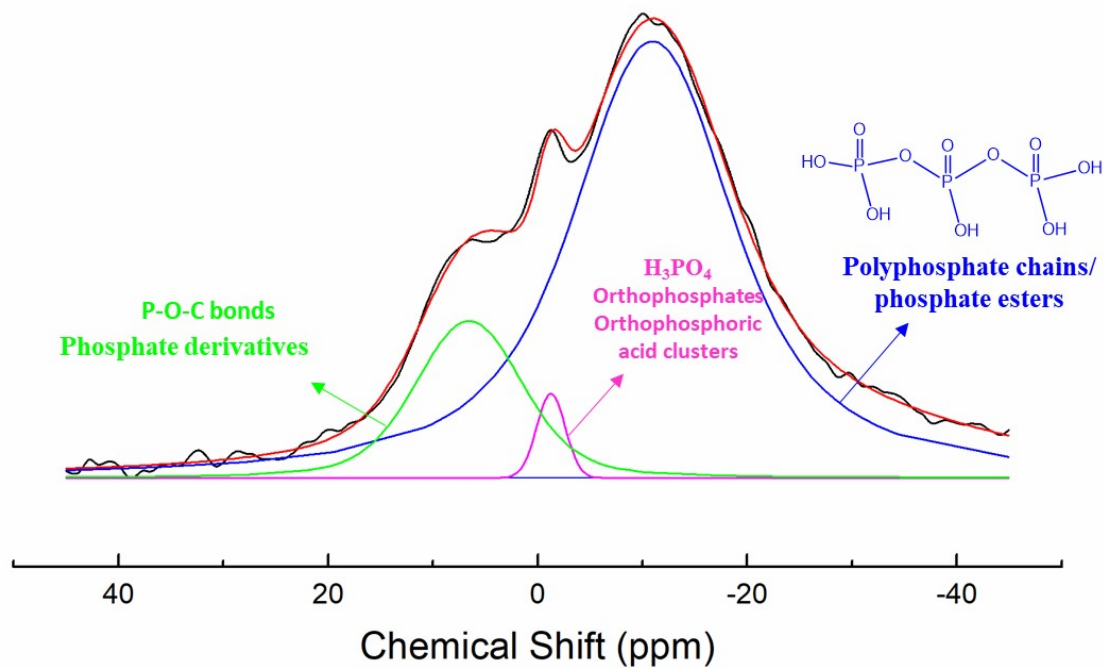

**Figure S7.** Solid-state  $^{31}\text{P}$  NMR spectrum obtained for the GO 50:90 hybrid. The black line is the experimental spectrum, the red line is the fitted spectrum and the other colored lines correspond to the components used in the spectral deconvolution, associated with the indicated groups.

## Supplementary DFT calculations

*Systems GO-Epoxy-Epoxy-H<sub>3</sub>PO<sub>4</sub> and GO-OH-OH-H<sub>3</sub>PO<sub>4</sub>*

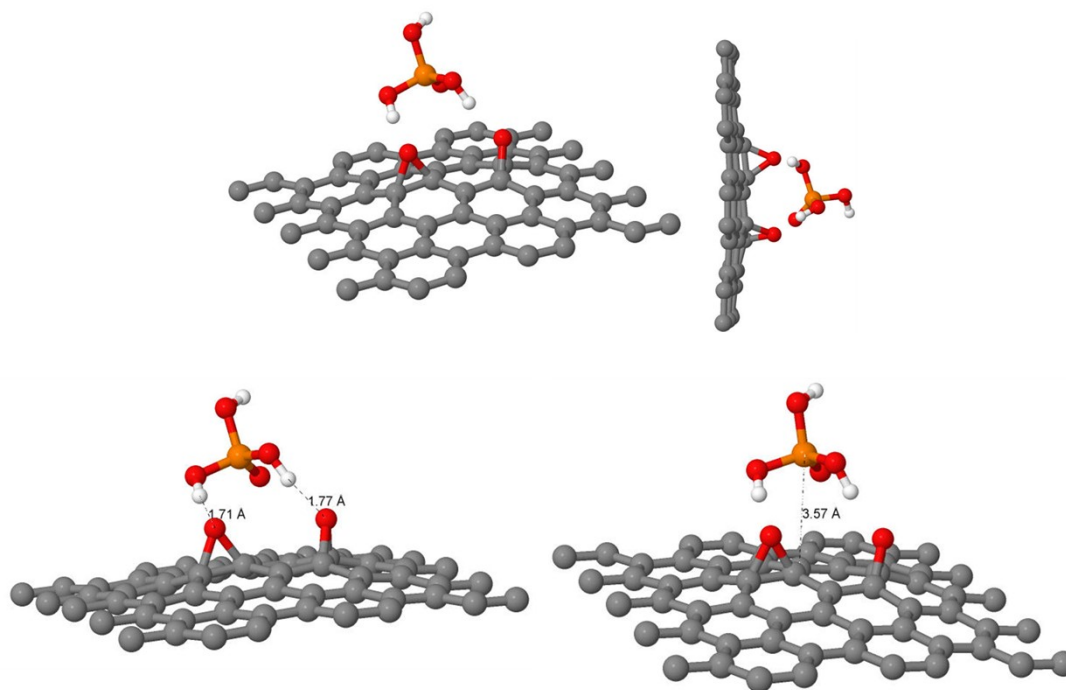

**Figure S8.** Model system used in the DFT calculations involving the adsorption of H<sub>3</sub>PO<sub>4</sub> on a GO sheet containing two neighboring epoxy groups (system GO-Epoxy-Epoxy-H<sub>3</sub>PO<sub>4</sub>), with indication of the formation of hydrogen bonds.

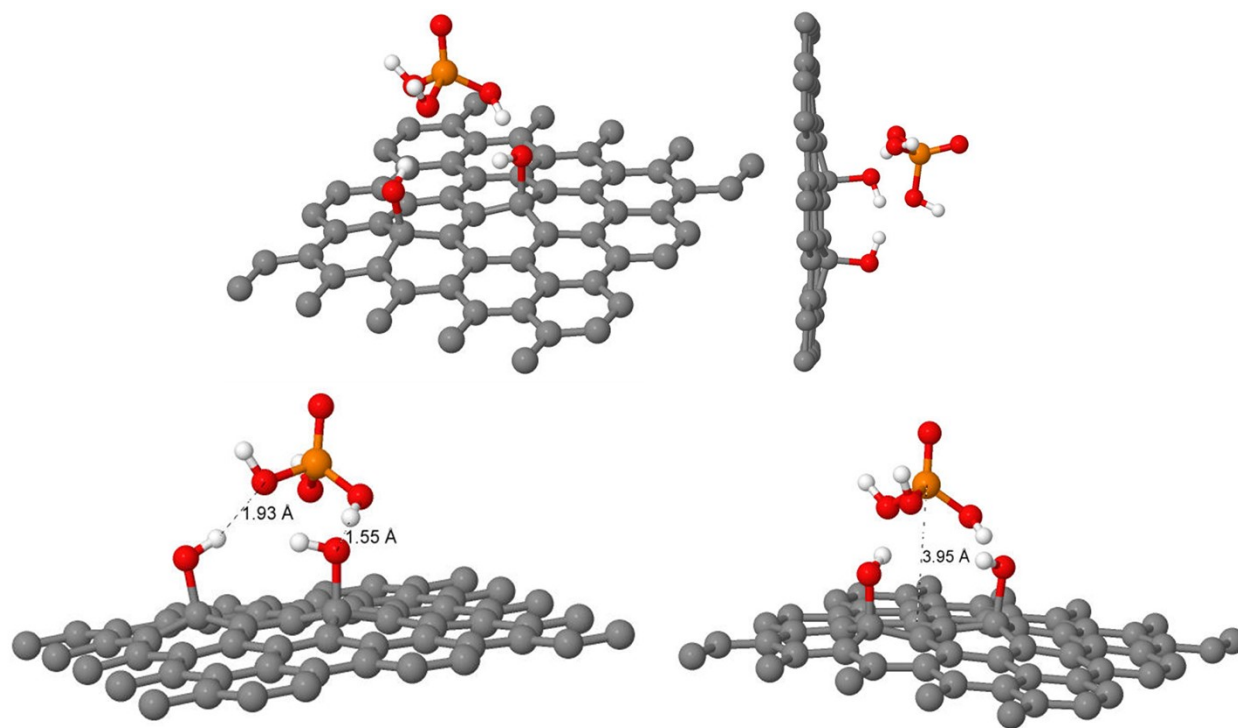

**Figure S9.** Model system used in the DFT calculations involving the adsorption of  $\text{H}_3\text{PO}_4$  on a GO sheet containing two neighboring hydroxyl groups (system GO-OH-OH- $\text{H}_3\text{PO}_4$ ), with indication of the formation of hydrogen bonds.

**Table S3.** Calculated adsorption energies, bond lengths and interatomic distances for the systems GO-Epoxy-Epoxy-H<sub>3</sub>PO<sub>4</sub> and GO-OH-OH-H<sub>3</sub>PO<sub>4</sub>.

| System                                            | Energy (eV)  | Distances (Å)            |
|---------------------------------------------------|--------------|--------------------------|
| <b>GO-Epoxy-Epoxy-H<sub>3</sub>PO<sub>4</sub></b> |              |                          |
|                                                   | <b>-0.91</b> | <i>d</i> : 3.57 Å        |
|                                                   |              | H bond = 1.71 Å / 1.77 Å |
| <b>GO-OH-OH-H<sub>3</sub>PO<sub>4</sub></b>       |              |                          |
|                                                   | <b>-1.14</b> | <i>d</i> : 3.95 Å        |
|                                                   |              | H bond = 1.55 Å / 1.93 Å |

**Table S4.** NMR chemical shifts calculated for the  $^{13}\text{C}$  and  $^{31}\text{P}$  nuclei in the systems GO-Epoxy-Epoxy- $\text{H}_3\text{PO}_4$  and GO-OH-OH- $\text{H}_3\text{PO}_4$ .

| System                                                   | $\delta^{13}\text{C}$ ppm | $\delta^{31}\text{P}$ ppm |
|----------------------------------------------------------|---------------------------|---------------------------|
| <b>GO-Epoxy-Epoxy-<math>\text{H}_3\text{PO}_4</math></b> |                           |                           |
| C=C                                                      | 116-133                   | -                         |
| C-O                                                      | 83                        | -                         |
| C-O                                                      | 78                        | -                         |
| C-O                                                      | 80                        | -                         |
| C-O                                                      | 75                        | -                         |
| $\text{H}_3\text{PO}_4$                                  | -                         | 5.5                       |
| <b>GO-OH-OH-<math>\text{H}_3\text{PO}_4</math></b>       |                           |                           |
| C=C                                                      | 102-145                   | -                         |
| C-OH                                                     | 79                        | -                         |
| C-OH                                                     | 68                        | -                         |
| $\text{H}_3\text{PO}_4$                                  | -                         | -1.4                      |

## Predicted NMR parameters

**Table S5.** Calculated shielding and chemical shift values (in ppm) for all  $^{13}\text{C}$  and  $^{31}\text{P}$  nuclei in the G- $\text{H}_3\text{PO}_4$  system.

| Nucleus | $\sigma_{\text{iso}}$ | $\delta_{\text{calc}}$ |
|---------|-----------------------|------------------------|
| C1      | 38.84                 | 126.86                 |
| C2      | 38.88                 | 126.82                 |
| C3      | 38.68                 | 127.02                 |
| C4      | 38.11                 | 127.59                 |
| C5      | 38.56                 | 127.14                 |
| C6      | 38.72                 | 126.98                 |
| C7      | 39.89                 | 125.81                 |
| C8      | 38.70                 | 127.00                 |
| C9      | 38.77                 | 126.93                 |
| C10     | 38.50                 | 127.20                 |
| C11     | 37.94                 | 127.76                 |
| C12     | 37.21                 | 128.49                 |
| C13     | 39.30                 | 126.40                 |
| C14     | 38.49                 | 127.21                 |
| C15     | 38.86                 | 126.84                 |
| C16     | 38.78                 | 126.92                 |
| C17     | 38.09                 | 127.61                 |
| C18     | 36.67                 | 129.03                 |
| C19     | 38.80                 | 126.90                 |
| C20     | 38.79                 | 126.91                 |
| C21     | 38.71                 | 126.99                 |
| C22     | 38.39                 | 127.31                 |
| C23     | 38.23                 | 127.47                 |
| C24     | 38.33                 | 127.37                 |
| C25     | 39.37                 | 126.33                 |
| C26     | 38.86                 | 126.84                 |
| C27     | 38.55                 | 127.15                 |
| C28     | 38.94                 | 126.76                 |
| C29     | 38.96                 | 126.74                 |
| C30     | 39.04                 | 126.66                 |
| C31     | 38.72                 | 126.98                 |
| C32     | 38.36                 | 127.34                 |
| C33     | 38.96                 | 126.74                 |



|     |        |        |
|-----|--------|--------|
| C34 | 38.72  | 126.98 |
| C35 | 38.43  | 127.27 |
| C36 | 39.16  | 126.54 |
| C37 | 42.13  | 123.57 |
| C38 | 38.84  | 126.86 |
| C39 | 38.46  | 127.24 |
| C40 | 38.56  | 127.14 |
| C41 | 36.65  | 129.05 |
| C42 | 38.21  | 127.49 |
| C43 | 38.57  | 127.13 |
| C44 | 38.37  | 127.33 |
| C45 | 38.69  | 127.01 |
| C46 | 38.45  | 127.25 |
| C47 | 37.29  | 128.41 |
| C48 | 41.22  | 124.48 |
| C49 | 38.82  | 126.88 |
| C50 | 38.47  | 127.23 |
| C51 | 38.96  | 126.74 |
| C52 | 38.82  | 126.88 |
| C53 | 38.48  | 127.22 |
| C54 | 38.77  | 126.93 |
| C55 | 38.69  | 127.01 |
| C56 | 38.65  | 127.05 |
| C57 | 38.35  | 127.35 |
| C58 | 38.63  | 127.07 |
| C59 | 38.55  | 127.15 |
| C60 | 38.70  | 127.00 |
| P   | 277.08 | 3.94   |

**Table S6.** Calculated shielding and chemical shift values (in ppm) for all  $^{13}\text{C}$  and  $^{31}\text{P}$  nuclei in the GO-Epoxy- $\text{H}_3\text{PO}_4$  system.

| <b>Nucleus</b> | <b><math>\sigma_{\text{iso}}</math></b> | <b><math>\delta_{\text{calc}}</math></b> |
|----------------|-----------------------------------------|------------------------------------------|
| C1             | 44.03                                   | 121.67                                   |
| C2             | 40.08                                   | 125.62                                   |
| C3             | 42.8                                    | 122.9                                    |
| C4             | 42.88                                   | 122.82                                   |
| C5             | 40.10                                   | 125.6                                    |
| C6             | 36.27                                   | 129.43                                   |
| C7             | 35.15                                   | 130.55                                   |
| C8             | 39.15                                   | 126.55                                   |
| C9             | 41.20                                   | 124.50                                   |
| C10            | 43.97                                   | 121.73                                   |
| C11            | 42.33                                   | 123.37                                   |
| C12            | 36.28                                   | 129.42                                   |
| C13            | 86.70                                   | 79.00                                    |
| C14            | 39.28                                   | 126.42                                   |
| C15            | 44.68                                   | 121.02                                   |
| C16            | 45.96                                   | 119.74                                   |
| C17            | 45.68                                   | 120.02                                   |
| C18            | 42.50                                   | 123.20                                   |
| C19            | 40.56                                   | 125.14                                   |
| C20            | 38.89                                   | 126.81                                   |
| C21            | 38.23                                   | 127.47                                   |
| C22            | 45.60                                   | 120.10                                   |
| C23            | 45.77                                   | 119.93                                   |
| C24            | 43.49                                   | 122.21                                   |
| C25            | 40.76                                   | 124.94                                   |
| C26            | 44.33                                   | 121.37                                   |
| C27            | 43.24                                   | 122.46                                   |
| C28            | 44.53                                   | 121.17                                   |
| C29            | 46.19                                   | 119.51                                   |
| C30            | 46.10                                   | 119.60                                   |
| C31            | 43.65                                   | 122.05                                   |
| C32            | 39.70                                   | 126.00                                   |
| C33            | 44.45                                   | 121.25                                   |
| C34            | 41.38                                   | 124.32                                   |
| C35            | 38.68                                   | 127.02                                   |

|     |        |        |
|-----|--------|--------|
| C36 | 36.73  | 128.97 |
| C37 | 38.70  | 127.00 |
| C38 | 38.72  | 126.98 |
| C39 | 42.92  | 122.78 |
| C40 | 43.39  | 122.31 |
| C41 | 43.91  | 121.79 |
| C42 | 40.98  | 124.72 |
| C43 | 81.66  | 84.04  |
| C44 | 37.52  | 128.18 |
| C45 | 42.99  | 122.71 |
| C46 | 45.63  | 120.07 |
| C47 | 45.98  | 119.72 |
| C48 | 41.21  | 124.49 |
| C49 | 39.34  | 126.36 |
| C50 | 37.59  | 128.11 |
| C51 | 36.68  | 129.02 |
| C52 | 45.89  | 119.81 |
| C53 | 44.66  | 121.04 |
| C54 | 43.15  | 122.55 |
| C55 | 42.87  | 122.83 |
| C56 | 42.89  | 122.81 |
| C57 | 42.95  | 122.75 |
| C58 | 46.32  | 119.38 |
| C59 | 45.99  | 119.71 |
| C60 | 45.96  | 119.74 |
| P   | 282.19 | -1.17  |

**Table S7.** Calculated shielding and chemical shift values (in ppm) for all  $^{13}\text{C}$  and  $^{31}\text{P}$  nuclei in the GO-OH- $\text{H}_3\text{PO}_4$  system.

| <b>Nucleus</b> | <b><math>\sigma_{\text{iso}}</math></b> | <b><math>\delta_{\text{calc}}</math></b> |
|----------------|-----------------------------------------|------------------------------------------|
| C1             | 40.40                                   | 125.30                                   |
| C2             | 39.20                                   | 126.50                                   |
| C3             | 47.81                                   | 117.89                                   |
| C4             | 42.68                                   | 123.02                                   |
| C5             | 27.41                                   | 138.29                                   |
| C6             | 44.30                                   | 121.40                                   |
| C7             | 45.84                                   | 119.86                                   |
| C8             | 34.13                                   | 131.57                                   |
| C9             | 47.62                                   | 118.08                                   |
| C10            | 44.64                                   | 121.06                                   |
| C11            | 49.42                                   | 116.28                                   |
| C12            | 55.71                                   | 109.99                                   |
| C13            | 7.91                                    | 157.79                                   |
| C14            | 43.15                                   | 122.55                                   |
| C15            | 47.76                                   | 117.94                                   |
| C16            | 41.57                                   | 124.13                                   |
| C17            | 52.48                                   | 113.22                                   |
| C18            | 53.83                                   | 111.87                                   |
| C19            | 17.26                                   | 148.44                                   |
| C20            | 22.52                                   | 143.18                                   |
| C21            | 39.15                                   | 126.55                                   |
| C22            | 59.92                                   | 105.78                                   |
| C23            | 45.34                                   | 120.36                                   |
| C24            | 42.25                                   | 123.45                                   |
| C25            | 51.14                                   | 114.56                                   |
| C26            | 42.90                                   | 122.80                                   |
| C27            | 55.10                                   | 110.60                                   |
| C28            | 46.51                                   | 119.19                                   |
| C29            | 51.66                                   | 114.04                                   |
| C30            | 64.37                                   | 101.33                                   |
| C31            | 56.74                                   | 108.96                                   |
| C32            | 42.35                                   | 123.35                                   |
| C33            | 49.76                                   | 115.94                                   |
| C34            | 45.14                                   | 120.56                                   |
| C35            | 46.93                                   | 118.77                                   |
| C36            | 35.71                                   | 129.99                                   |

|     |        |        |
|-----|--------|--------|
| C37 | 36.76  | 128.94 |
| C38 | 53.95  | 111.75 |
| C39 | 57.23  | 108.47 |
| C40 | 48.90  | 116.80 |
| C41 | 50.19  | 115.51 |
| C42 | 99.74  | 65.96  |
| C43 | 8.87   | 156.83 |
| C44 | 41.99  | 123.71 |
| C45 | 43.57  | 122.13 |
| C46 | 61.39  | 104.31 |
| C47 | 51.58  | 114.12 |
| C48 | 43.68  | 122.02 |
| C49 | 36.47  | 129.23 |
| C50 | 44.20  | 121.50 |
| C51 | 29.66  | 136.04 |
| C52 | 44.89  | 120.81 |
| C53 | 49.95  | 115.75 |
| C54 | 51.59  | 114.11 |
| C55 | 44.93  | 120.77 |
| C56 | 40.92  | 124.78 |
| C57 | 45.66  | 120.04 |
| C58 | 61.76  | 103.94 |
| C59 | 45.39  | 120.31 |
| C60 | 39.60  | 126.10 |
| P   | 280.14 | 0.88   |

**Table S8.** Calculated shielding and chemical shift values (in ppm) for all  $^{13}\text{C}$  and  $^{31}\text{P}$  nuclei in the GO-P-O-C system.

| Nucleus | $\sigma_{\text{iso}}$ | $\delta_{\text{calc}}$ |
|---------|-----------------------|------------------------|
| C1      | 45.30                 | 120.40                 |
| C2      | 45.44                 | 120.26                 |
| C3      | 48.97                 | 116.73                 |
| C4      | 43.36                 | 122.34                 |
| C5      | 29.22                 | 136.48                 |
| C6      | 39.52                 | 126.18                 |
| C7      | 46.66                 | 119.04                 |
| C8      | 35.92                 | 129.78                 |
| C9      | 44.35                 | 121.35                 |
| C10     | 46.24                 | 119.46                 |
| C11     | 35.57                 | 130.13                 |
| C12     | 26.40                 | 139.30                 |
| C14     | 16.44                 | 149.26                 |
| C15     | 40.60                 | 125.01                 |
| C16     | 43.10                 | 122.60                 |
| C17     | 46.16                 | 119.54                 |
| C18     | 46.42                 | 119.28                 |
| C19     | 40.75                 | 124.95                 |
| C20     | 10.11                 | 155.59                 |
| C22     | 31.05                 | 134.65                 |
| C23     | 35.53                 | 130.17                 |
| C24     | 54.09                 | 111.61                 |
| C25     | 40.54                 | 125.16                 |
| C26     | 38.96                 | 126.74                 |
| C27     | 48.03                 | 117.67                 |
| C28     | 36.73                 | 128.97                 |
| C29     | 44.41                 | 121.29                 |
| C30     | 42.26                 | 123.44                 |
| C31     | 44.12                 | 121.58                 |
| C32     | 48.17                 | 117.53                 |
| C33     | 51.60                 | 114.10                 |
| C34     | 43.40                 | 122.30                 |
| C35     | 41.46                 | 124.24                 |
| C36     | 43.52                 | 122.18                 |
| C37     | 33.69                 | 132.01                 |

|     |        |        |
|-----|--------|--------|
| C38 | 28.03  | 137.67 |
| C39 | 33.51  | 132.19 |
| C40 | 47.09  | 118.61 |
| C41 | 47.13  | 118.57 |
| C42 | 43.44  | 122.26 |
| C43 | 37.13  | 128.57 |
| C44 | 45.53  | 120.17 |
| C45 | 40.22  | 125.48 |
| C46 | 46.04  | 119.66 |
| C47 | 51.06  | 114.64 |
| C48 | 42.10  | 123.60 |
| C49 | 29.01  | 136.69 |
| C50 | 37.52  | 128.18 |
| C51 | 36.54  | 129.16 |
| C52 | 39.11  | 126.59 |
| C53 | 42.56  | 123.14 |
| C54 | 43.04  | 122.66 |
| C55 | 42.78  | 122.92 |
| C56 | 39.75  | 125.95 |
| C57 | 38.91  | 126.79 |
| C58 | 42.36  | 123.34 |
| C59 | 47.17  | 118.53 |
| C60 | 45.97  | 119.73 |
| C61 | 43.99  | 121.71 |
| P   | 276.44 | 4.58   |

**Table S9.** Calculated shielding and chemical shift values (in ppm) for all  $^{13}\text{C}$  and  $^{31}\text{P}$  nuclei in the GO-P-C system.

| <b>Nucleus</b> | <b><math>\sigma_{\text{iso}}</math></b> | <b><math>\delta_{\text{calc}}</math></b> |
|----------------|-----------------------------------------|------------------------------------------|
| C1             | 43.67                                   | 122.03                                   |
| C2             | 44.37                                   | 121.33                                   |
| C3             | 47.06                                   | 118.64                                   |
| C4             | 42.87                                   | 122.83                                   |
| C5             | 28.62                                   | 137.08                                   |
| C6             | 34.36                                   | 131.34                                   |
| C7             | 40.57                                   | 125.13                                   |
| C8             | 36.98                                   | 128.72                                   |
| C9             | 44.22                                   | 121.48                                   |
| C10            | 44.22                                   | 121.48                                   |
| C11            | 34.36                                   | 131.34                                   |
| C12            | 24.90                                   | 140.80                                   |
| C13            | 13.86                                   | 151.84                                   |
| C14            | 50.52                                   | 115.18                                   |
| C15            | 39.08                                   | 126.62                                   |
| C16            | 42.69                                   | 123.01                                   |
| C17            | 44.30                                   | 121.40                                   |
| C18            | 45.40                                   | 120.30                                   |
| C19            | 37.81                                   | 127.89                                   |
| C20            | -1.14                                   | 166.84                                   |
| C21            | 7.75                                    | 157.95                                   |
| C22            | 16.87                                   | 148.83                                   |
| C23            | 33.24                                   | 132.46                                   |
| C24            | 50.76                                   | 114.94                                   |
| C25            | 40.57                                   | 125.13                                   |
| C26            | 40.06                                   | 125.64                                   |
| C27            | 43.84                                   | 121.86                                   |
| C28            | 34.08                                   | 131.62                                   |
| C29            | 43.04                                   | 122.66                                   |
| C30            | 42.36                                   | 123.34                                   |
| C31            | 43.32                                   | 122.38                                   |
| C32            | 46.63                                   | 119.07                                   |
| C33            | 49.50                                   | 116.20                                   |
| C34            | 39.55                                   | 126.15                                   |
| C35            | 41.27                                   | 124.43                                   |
| C36            | 41.83                                   | 123.87                                   |



|     |        |        |
|-----|--------|--------|
| C37 | 31.06  | 134.64 |
| C38 | 24.14  | 141.56 |
| C39 | 23.09  | 142.61 |
| C40 | 43.19  | 122.51 |
| C41 | 45.78  | 119.92 |
| C42 | 41.35  | 124.35 |
| C43 | 32.94  | 132.76 |
| C44 | 35.21  | 130.49 |
| C45 | 41.02  | 124.68 |
| C46 | 45.10  | 120.60 |
| C47 | 49.40  | 116.30 |
| C48 | 40.93  | 124.77 |
| C49 | 25.26  | 140.44 |
| C50 | 30.93  | 134.77 |
| C51 | 32.29  | 133.41 |
| C52 | 35.87  | 129.83 |
| C53 | 40.77  | 124.93 |
| C54 | 43.94  | 121.76 |
| C55 | 40.83  | 124.87 |
| C56 | 36.51  | 129.19 |
| C57 | 37.76  | 127.94 |
| C58 | 40.22  | 125.48 |
| C59 | 45.25  | 120.45 |
| C60 | 44.40  | 121.30 |
| C61 | 42.03  | 123.67 |
| P   | 263.75 | 17.27  |

**Table S10.** Calculated shielding and chemical shift values (in ppm) for all  $^{13}\text{C}$  and  $^{31}\text{P}$  nuclei in the GO-Epoxy-Epoxy- $\text{H}_3\text{PO}_4$  system.

| <b>Nucleus</b> | <b><math>\sigma_{\text{iso}}</math></b> | <b><math>\delta_{\text{calc}}</math></b> |
|----------------|-----------------------------------------|------------------------------------------|
| C1             | 47.98                                   | 117.72                                   |
| C2             | 43.52                                   | 122.18                                   |
| C3             | 46.08                                   | 119.62                                   |
| C4             | 44.87                                   | 120.83                                   |
| C5             | 37.16                                   | 128.54                                   |
| C6             | 37.08                                   | 128.62                                   |
| C7             | 41.03                                   | 124.67                                   |
| C8             | 40.79                                   | 124.91                                   |
| C9             | 47.55                                   | 118.15                                   |
| C10            | 41.66                                   | 124.04                                   |
| C11            | 37.44                                   | 128.26                                   |
| C12            | 82.43                                   | 83.27                                    |
| C13            | 33.92                                   | 131.78                                   |
| C14            | 42.63                                   | 123.07                                   |
| C15            | 43.39                                   | 122.31                                   |
| C16            | 43.63                                   | 122.07                                   |
| C17            | 46.99                                   | 118.71                                   |
| C18            | 32.25                                   | 133.45                                   |
| C19            | 87.91                                   | 77.79                                    |
| C20            | 36.28                                   | 129.42                                   |
| C21            | 41.72                                   | 123.98                                   |
| C22            | 46.56                                   | 119.14                                   |
| C23            | 41.35                                   | 124.35                                   |
| C24            | 41.21                                   | 124.49                                   |
| C25            | 38.38                                   | 127.32                                   |
| C26            | 33.63                                   | 132.07                                   |
| C27            | 41.39                                   | 124.31                                   |
| C28            | 41.94                                   | 123.76                                   |
| C29            | 44.72                                   | 120.98                                   |

|     |        |        |
|-----|--------|--------|
| C30 | 45.33  | 120.37 |
| C31 | 45.43  | 120.27 |
| C32 | 48.15  | 117.55 |
| C33 | 49.29  | 116.41 |
| C34 | 41.19  | 124.51 |
| C35 | 34.10  | 131.60 |
| C36 | 39.62  | 126.08 |
| C37 | 44.58  | 121.12 |
| C38 | 47.63  | 118.07 |
| C39 | 42.08  | 123.62 |
| C40 | 35.17  | 130.53 |
| C41 | 86.09  | 79.61  |
| C42 | 46.91  | 118.79 |
| C43 | 34.29  | 131.41 |
| C44 | 42.28  | 123.42 |
| C45 | 48.87  | 116.83 |
| C46 | 46.77  | 118.93 |
| C47 | 41.06  | 124.64 |
| C48 | 37.08  | 128.62 |
| C49 | 91.01  | 74.69  |
| C50 | 33.86  | 131.84 |
| C51 | 36.62  | 129.08 |
| C52 | 47.27  | 118.43 |
| C53 | 41.91  | 123.79 |
| C54 | 39.15  | 126.55 |
| C55 | 35.46  | 130.24 |
| C56 | 37.36  | 128.34 |
| C57 | 43.95  | 121.75 |
| C58 | 45.40  | 120.30 |
| C59 | 41.93  | 123.77 |
| C60 | 47.74  | 117.96 |
| P   | 275.56 | 5.46   |

**Table S11.** Calculated shielding and chemical shift values (in ppm) for all  $^{13}\text{C}$  and  $^{31}\text{P}$  nuclei in the GO-OH-OH- $\text{H}_3\text{PO}_4$  system.

| <b>Nucleus</b> | <b><math>\sigma_{\text{iso}}</math></b> | <b><math>\delta_{\text{calc}}</math></b> |
|----------------|-----------------------------------------|------------------------------------------|
| C1             | 52.22                                   | 113.48                                   |
| C2             | 45.87                                   | 119.83                                   |
| C3             | 56.84                                   | 108.86                                   |
| C4             | 44.88                                   | 120.82                                   |
| C5             | 38.49                                   | 127.21                                   |
| C6             | 26.41                                   | 139.29                                   |
| C7             | 37.97                                   | 127.73                                   |
| C8             | 54.63                                   | 111.07                                   |
| C9             | 45.68                                   | 120.02                                   |
| C10            | 45.65                                   | 120.05                                   |
| C11            | 38.58                                   | 127.12                                   |
| C12            | 20.46                                   | 145.24                                   |
| C13            | 27.42                                   | 138.28                                   |
| C14            | 45.39                                   | 120.31                                   |
| C15            | 63.07                                   | 102.63                                   |
| C16            | 62.68                                   | 103.02                                   |
| C17            | 49.06                                   | 116.64                                   |
| C18            | 43.07                                   | 122.63                                   |
| C19            | 87.08                                   | 78.62                                    |
| C20            | 37.43                                   | 128.27                                   |
| C21            | 30.29                                   | 135.41                                   |
| C22            | 52.17                                   | 113.53                                   |
| C23            | 54.83                                   | 110.87                                   |
| C24            | 40.47                                   | 125.23                                   |
| C25            | 49.11                                   | 116.59                                   |
| C26            | 41.99                                   | 123.71                                   |
| C27            | 49.69                                   | 116.01                                   |
| C28            | 58.77                                   | 106.93                                   |
| C29            | 49.37                                   | 116.33                                   |

|     |        |        |
|-----|--------|--------|
| C30 | 59.57  | 106.13 |
| C31 | 58.89  | 106.81 |
| C32 | 49.23  | 116.47 |
| C33 | 40.47  | 125.23 |
| C34 | 54.95  | 110.75 |
| C35 | 40.71  | 124.99 |
| C36 | 97.63  | 68.07  |
| C37 | 43.87  | 121.83 |
| C38 | 47.09  | 118.61 |
| C39 | 63.12  | 102.58 |
| C40 | 50.07  | 115.63 |
| C41 | 31.26  | 134.44 |
| C42 | 31.59  | 134.11 |
| C43 | 37.09  | 128.61 |
| C44 | 44.78  | 120.92 |
| C45 | 49.01  | 116.69 |
| C46 | 47.02  | 118.68 |
| C47 | 55.68  | 110.02 |
| C48 | 50.24  | 115.46 |
| C49 | 26.48  | 139.22 |
| C50 | 38.45  | 127.25 |
| C51 | 41.23  | 124.47 |
| C52 | 50.64  | 115.06 |
| C53 | 45.28  | 120.42 |
| C54 | 60.47  | 105.23 |
| C55 | 47.67  | 118.03 |
| C56 | 33.26  | 132.44 |
| C57 | 53.74  | 111.96 |
| C58 | 53.37  | 112.33 |
| C59 | 65.32  | 100.38 |
| C60 | 61.60  | 104.10 |
| P   | 282.43 | -1.41  |

**Table S12.** Calculated shielding and chemical shift values (in ppm) for all  $^{13}\text{C}$  and  $^{31}\text{P}$  nuclei in the GO-Epoxy-OH- $\text{H}_3\text{PO}_4$  system.

| <b>Nucleus</b> | <b><math>\sigma_{\text{iso}}</math></b> | <b><math>\delta_{\text{calc}}</math></b> |
|----------------|-----------------------------------------|------------------------------------------|
| C1             | 55.92                                   | 109.78                                   |
| C2             | 51.88                                   | 113.82                                   |
| C3             | 50.05                                   | 115.65                                   |
| C4             | 49.79                                   | 115.91                                   |
| C5             | 43.37                                   | 122.33                                   |
| C6             | 40.41                                   | 125.29                                   |
| C7             | 45.56                                   | 120.14                                   |
| C8             | 43.48                                   | 122.22                                   |
| C9             | 54.77                                   | 110.93                                   |
| C10            | 50.82                                   | 114.88                                   |
| C11            | 33.50                                   | 132.20                                   |
| C12            | 77.19                                   | 88.51                                    |
| C13            | 32.35                                   | 133.35                                   |
| C14            | 54.89                                   | 110.81                                   |
| C15            | 56.23                                   | 109.47                                   |
| C16            | 54.70                                   | 111.00                                   |
| C17            | 48.07                                   | 117.63                                   |
| C18            | 38.88                                   | 126.82                                   |
| C19            | 87.38                                   | 78.32                                    |
| C20            | 46.83                                   | 118.87                                   |
| C21            | 49.34                                   | 116.36                                   |
| C22            | 54.73                                   | 110.97                                   |
| C23            | 51.39                                   | 114.31                                   |
| C24            | 53.34                                   | 112.36                                   |
| C25            | 50.66                                   | 115.04                                   |
| C26            | 45.11                                   | 120.59                                   |
| C27            | 53.71                                   | 111.99                                   |
| C28            | 55.24                                   | 110.46                                   |
| C29            | 58.71                                   | 106.99                                   |

|     |        |        |
|-----|--------|--------|
| C30 | 63.58  | 102.12 |
| C31 | 53.62  | 112.08 |
| C32 | 48.20  | 117.50 |
| C33 | 52.89  | 112.81 |
| C34 | 49.63  | 116.07 |
| C35 | 34.62  | 131.08 |
| C36 | 42.78  | 122.92 |
| C37 | 39.08  | 126.62 |
| C38 | 51.50  | 114.20 |
| C39 | 59.62  | 106.08 |
| C40 | 36.17  | 129.53 |
| C41 | 66.37  | 99.33  |
| C42 | 40.13  | 125.57 |
| C43 | 47.34  | 118.36 |
| C44 | 50.74  | 114.96 |
| C45 | 56.96  | 108.74 |
| C46 | 53.39  | 112.31 |
| C47 | 52.19  | 113.51 |
| C48 | 32.39  | 133.31 |
| C49 | 43.30  | 122.40 |
| C50 | 45.74  | 119.96 |
| C51 | 45.45  | 120.25 |
| C52 | 48.95  | 116.75 |
| C53 | 51.96  | 113.74 |
| C54 | 56.71  | 108.99 |
| C55 | 49.09  | 116.61 |
| C56 | 43.62  | 122.08 |
| C57 | 50.24  | 115.46 |
| C58 | 62.83  | 102.87 |
| C59 | 55.76  | 109.94 |
| C60 | 54.07  | 111.63 |
| P   | 278.08 | 2.94   |

**Table S13.** Cartesian coordinates (in Å) of the atoms in all studied systems.

**G-H<sub>3</sub>PO<sub>4</sub>**

|   |              |              |             |
|---|--------------|--------------|-------------|
| C | 1.028744287  | 0.826608081  | 4.466196178 |
| C | 3.489048182  | 0.826916789  | 4.444926162 |
| C | 2.258792000  | 2.956270082  | 4.445651634 |
| C | 1.028386804  | 5.086611191  | 4.445234994 |
| C | 5.949131315  | 0.827328484  | 4.427883766 |
| C | 4.719526873  | 2.956039945  | 4.413495631 |
| C | 3.489213345  | 5.085057334  | 4.409801375 |
| C | 2.257208025  | 7.217920633  | 4.431453366 |
| C | 1.028500563  | 9.346869395  | 4.455434787 |
| C | 8.408894245  | 0.827589536  | 4.441154836 |
| C | 7.179110081  | 2.958108548  | 4.407212243 |
| C | 5.950312489  | 5.085489422  | 4.371259193 |
| C | 4.720721768  | 7.217695122  | 4.380961374 |
| C | 3.489009963  | 9.347095001  | 4.423516201 |
| C | 2.258965530  | 11.476774300 | 4.455726577 |
| C | 10.868668330 | 0.827242682  | 4.463521047 |
| C | 9.638382327  | 2.957404175  | 4.437178032 |
| C | 8.408315800  | 5.086250682  | 4.398402617 |
| C | 7.180272321  | 7.214852666  | 4.381617094 |
| C | 5.947815495  | 9.347816144  | 4.401800608 |
| C | 4.718855177  | 11.477161535 | 4.431167628 |
| C | 12.098607693 | 2.956915755  | 4.457914115 |
| C | 10.867823549 | 5.086783304  | 4.439602600 |
| C | 9.638071727  | 7.215603629  | 4.423934666 |



C 8.410203746 9.347201759 4.428616313  
C 7.178968184 11.477371556 4.432402615  
C 12.097942474 7.216750313 4.448975940  
C 10.868783158 9.346611774 4.454897962  
C 9.638990462 11.477216659 4.455935456  
C 12.098788079 11.476809720 4.469460183  
C 1.028585449 2.246384765 4.460151113  
C 3.489343849 2.246481929 4.436341763  
C 2.257982047 4.375519122 4.436253261  
C 1.028116549 6.506846389 4.443857035  
C 5.949524547 2.246944320 4.414596076  
C 4.720852341 4.375531270 4.392740802  
C 3.488448485 6.506931740 4.406152108  
C 2.258576616 8.637012671 4.437283365  
C 1.028808947 10.766614872 4.462990466  
C 8.408653463 2.247331988 4.428947945  
C 7.179738152 4.376481530 4.386062239  
C 4.718675260 8.637879763 4.396540985  
C 3.489071410 10.766647514 4.437586357  
C 2.258953209 12.896497660 4.458533521  
C 10.868301256 2.246914884 4.455937513  
C 9.637678284 4.377047010 4.425172689  
C 8.409413807 6.504744732 4.397470761  
C 7.179133902 8.635789868 4.402371035  
C 5.948772226 10.767240436 4.421147243  
C 4.719159405 12.896975565 4.435205669  
C 12.098057056 4.376623011 4.450652550  
C 10.868243314 6.506113841 4.439091040

|   |              |              |             |
|---|--------------|--------------|-------------|
| C | 9.639172169  | 8.635755459  | 4.436439846 |
| C | 8.409160964  | 10.766958022 | 4.440390070 |
| C | 7.179062980  | 12.896912756 | 4.434352617 |
| C | 12.098729908 | 8.636375646  | 4.455451519 |
| C | 10.868709365 | 10.766346105 | 4.463028444 |
| C | 9.638696428  | 12.897074644 | 4.455898934 |
| C | 12.098633312 | 12.896572761 | 4.470180839 |
| C | 5.949889870  | 6.505023748  | 4.366182214 |
| P | 5.974742751  | 6.467755837  | 7.906319438 |
| O | 5.957020392  | 6.495478023  | 9.515418274 |
| H | 5.140691459  | 6.923950942  | 9.874532158 |
| O | 4.456315939  | 5.989619003  | 7.610271112 |
| H | 4.215239662  | 6.080297952  | 6.649962234 |
| O | 5.972812407  | 8.029775603  | 7.445869424 |
| H | 6.706270289  | 8.183551146  | 6.795245570 |
| O | 7.086678542  | 5.668641260  | 7.349176582 |

## GO-Epoxy-H<sub>3</sub>PO<sub>4</sub>

|   |          |          |          |
|---|----------|----------|----------|
| C | 0.83377  | 0.57611  | 14.34851 |
| C | 3.29242  | 0.57937  | 14.46926 |
| C | 2.05908  | 2.70362  | 14.49213 |
| C | 0.83015  | 4.83348  | 14.53344 |
| C | 5.75046  | 0.57249  | 14.61061 |
| C | 4.50975  | 2.70434  | 14.76117 |
| C | 3.28058  | 4.82771  | 14.73403 |
| C | 2.07045  | 6.95753  | 14.62714 |
| C | 0.84208  | 9.08912  | 14.48496 |
| C | 8.21223  | 0.56698  | 14.52504 |
| C | 6.98984  | 2.66009  | 14.84500 |
| C | 5.69284  | 4.82041  | 15.27380 |
| C | 4.53465  | 6.95867  | 14.91270 |
| C | 3.30032  | 9.09810  | 14.60661 |
| C | 2.06345  | 11.22452 | 14.40549 |
| C | 10.66892 | 0.57219  | 14.38185 |
| C | 9.44599  | 2.70110  | 14.59736 |
| C | 8.25063  | 4.83621  | 14.98319 |
| C | 6.98694  | 6.95117  | 15.37359 |
| C | 5.72650  | 9.12448  | 14.87051 |
| C | 4.52106  | 11.22994 | 14.54278 |
| C | 11.89899 | 2.70831  | 14.42819 |
| C | 10.67096 | 4.83349  | 14.62688 |
| C | 9.44752  | 6.95667  | 14.86949 |
| C | 8.24129  | 9.12067  | 14.83800 |
| C | 6.98286  | 11.22442 | 14.63260 |

|   |          |          |          |
|---|----------|----------|----------|
| C | 11.90287 | 6.96528  | 14.59519 |
| C | 10.67229 | 9.08981  | 14.57737 |
| C | 9.44796  | 11.21943 | 14.47724 |
| C | 11.90399 | 11.22193 | 14.37330 |
| C | 0.82947  | 1.99644  | 14.39432 |
| C | 3.28777  | 1.99416  | 14.55248 |
| C | 2.05417  | 4.12293  | 14.56433 |
| C | 0.83314  | 6.25521  | 14.57378 |
| C | 5.75833  | 1.98333  | 14.76176 |
| C | 4.47898  | 4.09799  | 14.89985 |
| C | 3.28661  | 6.24924  | 14.75948 |
| C | 2.06627  | 8.38722  | 14.56735 |
| C | 0.83545  | 10.51494 | 14.40389 |
| C | 8.20691  | 1.98338  | 14.63431 |
| C | 7.01996  | 4.07248  | 15.22862 |
| C | 5.70689  | 6.26850  | 15.14722 |
| C | 4.52818  | 8.40674  | 14.80501 |
| C | 3.29398  | 10.51583 | 14.50566 |
| C | 2.06129  | 12.64790 | 14.38171 |
| C | 10.66269 | 1.99868  | 14.44610 |
| C | 9.44948  | 4.12348  | 14.71338 |
| C | 8.24651  | 6.22536  | 15.07843 |
| C | 6.98968  | 8.45167  | 15.20630 |
| C | 5.74597  | 10.52058 | 14.67354 |
| C | 4.52158  | 12.64845 | 14.52628 |
| C | 11.89829 | 4.12393  | 14.50380 |
| C | 10.66814 | 6.25653  | 14.69515 |
| C | 9.44416  | 8.39412  | 14.77896 |

|   |          |          |          |
|---|----------|----------|----------|
| C | 8.21789  | 10.50942 | 14.63110 |
| C | 6.98213  | 12.63487 | 14.57913 |
| C | 11.90212 | 8.38147  | 14.54730 |
| C | 10.67040 | 10.50979 | 14.46011 |
| C | 9.44090  | 12.64112 | 14.43422 |
| C | 11.89664 | 12.64233 | 14.33853 |
| O | 7.02653  | 7.83228  | 16.58588 |
| P | 6.20640  | 6.26209  | 18.78360 |
| O | 7.22957  | 7.21406  | 19.10046 |
| H | 7.05471  | 8.34134  | 19.42444 |
| O | 6.75949  | 6.56145  | 17.52231 |
| H | 7.68181  | 6.26236  | 17.49447 |
| O | 5.45491  | 5.66215  | 17.88010 |
| H | 4.66916  | 4.76763  | 18.16223 |
| O | 5.69855  | 6.01596  | 20.12093 |

## GO-Epoxy-Epoxy-H<sub>3</sub>PO<sub>4</sub>

|   |               |               |               |
|---|---------------|---------------|---------------|
| C | 0.5184953131  | 0.6169175664  | 14.3973477469 |
| C | 2.9759438346  | 0.6199435590  | 14.5281629474 |
| C | 1.7423985157  | 2.7438420386  | 14.5551875975 |
| C | 0.5130549781  | 4.8730408144  | 14.5677867326 |
| C | 5.4346519274  | 0.6128327684  | 14.6447872869 |
| C | 4.1946209497  | 2.7451547503  | 14.8122424340 |
| C | 2.9636184604  | 4.8680255498  | 14.7925329964 |
| C | 1.7520191017  | 6.9973281987  | 14.6603006340 |
| C | 0.5257871911  | 9.1284107033  | 14.5006966736 |
| C | 7.8967744279  | 0.6078804220  | 14.5344410717 |
| C | 6.6765053364  | 2.7000888606  | 14.8539972319 |
| C | 5.3901449591  | 4.8633809501  | 15.2827769158 |
| C | 4.2178251045  | 6.9970682393  | 14.9300260443 |
| C | 2.9829140765  | 9.1372345752  | 14.6317046443 |
| C | 1.7470272710  | 11.2652434971 | 14.4473304489 |
| C | 10.3540923250 | 0.6134706289  | 14.3987941597 |
| C | 9.1305330629  | 2.7432634700  | 14.5889093140 |
| C | 7.9345523301  | 4.8775349629  | 14.9440860845 |
| C | 6.6764803730  | 6.9961490035  | 15.3224596951 |
| C | 5.4111451642  | 9.1640155775  | 14.8645432780 |
| C | 4.2040227051  | 11.2706101550 | 14.5762698531 |
| C | 11.5838187961 | 2.7489046879  | 14.4541668868 |
| C | 10.3529559486 | 4.8736602010  | 14.5970905319 |
| C | 9.1304077064  | 6.9953929084  | 14.8023512021 |
| C | 7.9262130222  | 9.1592536720  | 14.7959471470 |
| C | 6.6674389073  | 11.2656046007 | 14.6387750123 |

|   |               |               |               |
|---|---------------|---------------|---------------|
| C | 11.5854629735 | 7.0042996832  | 14.5824848992 |
| C | 10.3565846523 | 9.1293327220  | 14.5483296758 |
| C | 9.1327389389  | 11.2612035996 | 14.4714287997 |
| C | 11.5890100277 | 11.2629392025 | 14.3896161337 |
| C | 0.5137811807  | 2.0370853524  | 14.4449860412 |
| C | 2.9712519470  | 2.0346202577  | 14.6158883728 |
| C | 1.7368478356  | 4.1628731858  | 14.6235836615 |
| C | 0.5157198915  | 6.2953902177  | 14.5959259056 |
| C | 5.4441389403  | 2.0236108980  | 14.7940690106 |
| C | 4.1647014213  | 4.1399374725  | 14.9498868207 |
| C | 2.9681032690  | 6.2898596826  | 14.8009802057 |
| C | 1.7487858587  | 8.4266036818  | 14.5931326375 |
| C | 0.5196271134  | 10.5553009759 | 14.4294051991 |
| C | 7.8919754189  | 2.0243969089  | 14.6378796109 |
| C | 6.7082362818  | 4.1176428357  | 15.2174633735 |
| C | 5.3953790693  | 6.3076552957  | 15.1447978143 |
| C | 4.2122204211  | 8.4459162742  | 14.8145951912 |
| C | 2.9775174595  | 10.5559236717 | 14.5405246216 |
| C | 1.7453845336  | 12.6884920752 | 14.4361128668 |
| C | 10.3478653095 | 2.0395788957  | 14.4577025485 |
| C | 9.1328712796  | 4.1648697019  | 14.6794721736 |
| C | 7.9300832685  | 6.2665944774  | 15.0187899544 |
| C | 6.6788637254  | 8.4854429518  | 15.1645546424 |
| C | 5.4309242653  | 10.5614808171 | 14.6854139107 |
| C | 4.2049984362  | 12.6893344708 | 14.5717942832 |
| C | 11.5816016652 | 4.1643826414  | 14.5139258500 |
| C | 10.3502576836 | 6.2953739433  | 14.6510946970 |
| C | 9.1272706903  | 8.4319913966  | 14.7233355410 |

|   |               |               |               |
|---|---------------|---------------|---------------|
| C | 7.9019016080  | 10.5513318002 | 14.6178033576 |
| C | 6.6667704864  | 12.6762941738 | 14.5967913160 |
| C | 11.5854809443 | 8.4202819178  | 14.5369318302 |
| C | 10.3545657881 | 10.5503655560 | 14.4521029779 |
| C | 9.1256639686  | 12.6826470492 | 14.4404917498 |
| C | 11.5817205929 | 12.6831782781 | 14.3674470072 |
| O | 6.7234528161  | 7.8769435398  | 16.5762024566 |
| O | 6.0774898833  | 4.3761795346  | 16.5768969077 |
| P | 9.0244972423  | 5.9867970528  | 18.4046517128 |
| O | 9.5860341346  | 6.1513567595  | 19.9138782309 |
| H | 10.0983253555 | 5.3381256749  | 20.1457934291 |
| O | 9.0525093300  | 7.5174573287  | 17.9251242285 |
| H | 8.1997117554  | 7.7493340752  | 17.4259424295 |
| O | 7.4699918778  | 5.6259600177  | 18.6230283488 |
| H | 7.0437836097  | 5.1953699670  | 17.8165517347 |
| O | 9.7932352580  | 5.0174416230  | 17.5729232635 |



## GO-OH-H<sub>3</sub>PO<sub>4</sub>

|   |          |          |          |
|---|----------|----------|----------|
| C | 0.84151  | 0.62801  | 14.40090 |
| C | 3.29955  | 0.62838  | 14.46376 |
| C | 2.07004  | 2.74799  | 14.41870 |
| C | 0.84077  | 4.86367  | 14.59463 |
| C | 5.76147  | 0.62819  | 14.45781 |
| C | 4.52982  | 2.75609  | 14.44975 |
| C | 3.29403  | 4.86463  | 14.65330 |
| C | 2.06665  | 6.96363  | 14.92271 |
| C | 0.83841  | 9.10100  | 14.82703 |
| C | 8.21957  | 0.62705  | 14.38925 |
| C | 6.99057  | 2.74716  | 14.40770 |
| C | 5.76374  | 4.86174  | 14.66558 |
| C | 4.52368  | 6.92540  | 15.22443 |
| C | 3.26904  | 9.12681  | 15.01530 |
| C | 2.06479  | 11.21542 | 14.64482 |
| C | 10.68082 | 0.62576  | 14.36359 |
| C | 9.45083  | 2.74988  | 14.36293 |
| C | 8.21874  | 4.86416  | 14.58113 |
| C | 6.99236  | 6.96419  | 14.92365 |
| C | 5.78827  | 9.12537  | 15.01922 |
| C | 4.53022  | 11.21934 | 14.72376 |
| C | 11.90981 | 2.74970  | 14.37171 |
| C | 10.67993 | 4.86103  | 14.54820 |
| C | 9.45180  | 6.97732  | 14.75620 |
| C | 8.22035  | 9.09994  | 14.81453 |
| C | 6.99542  | 11.21359 | 14.63382 |

C 11.90742 6.97665 14.76712  
C 10.67991 9.09507 14.74290  
C 9.45307 11.21282 14.56175  
C 11.90777 11.21351 14.56892  
C 0.84184 2.04335 14.37018  
C 3.29994 2.04380 14.42036  
C 2.06629 4.16258 14.53142  
C 0.83946 6.27099 14.76453  
C 5.76039 2.04362 14.41515  
C 4.52820 4.15938 14.58002  
C 3.27102 6.24818 14.90589  
C 2.06644 8.40653 14.96912  
C 0.83936 10.51186 14.68819  
C 8.21886 2.04282 14.35710  
C 6.99361 4.16152 14.52681  
C 5.78495 6.24652 14.92620  
C 4.52653 8.43584 15.29431  
C 3.29262 10.51599 14.79833  
C 2.06919 12.62567 14.48790  
C 10.68068 2.04424 14.33499  
C 9.45196 4.16152 14.47538  
C 8.21920 6.27259 14.75197  
C 6.99183 8.40638 14.96506  
C 5.76708 10.51380 14.79528  
C 4.53050 12.61820 14.53967  
C 11.90821 4.16118 14.48595  
C 10.67940 6.27678 14.68934  
C 9.45146 8.39288 14.78563

C 8.22086 10.51053 14.67572  
C 6.99185 12.62441 14.47679  
C 11.90755 8.39319 14.79526  
C 10.68059 10.51329 14.63084  
C 9.45167 12.62175 14.41960  
C 11.90961 12.62216 14.42622  
O 4.80006 3.20335 18.20509  
O 3.36257 5.16090 18.33527  
O 5.89951 5.50591 18.64455  
O 4.63118 4.35527 20.54793  
P 4.66696 4.56610 19.08546  
H 5.04698 2.47940 18.82851  
H 3.32011 6.15237 18.36278  
H 5.84053 5.78353 17.69288  
O 5.78549 6.85168 16.59237  
H 6.34313 7.77233 16.97433

**GO-OH-OH-H<sub>3</sub>PO<sub>4</sub>**

|   |          |          |          |
|---|----------|----------|----------|
| C | 1.10421  | 0.28689  | 14.58087 |
| C | 3.56220  | 0.28546  | 14.64171 |
| C | 2.32208  | 2.41604  | 14.75299 |
| C | 1.09998  | 4.55257  | 14.67183 |
| C | 6.01575  | 0.29590  | 14.68325 |
| C | 4.78086  | 2.38696  | 14.92601 |
| C | 3.52983  | 4.56011  | 14.93454 |
| C | 2.32661  | 6.67606  | 14.69119 |
| C | 1.10300  | 8.80393  | 14.58452 |
| C | 8.47189  | 0.30731  | 14.64903 |
| C | 7.24971  | 2.44123  | 14.86956 |
| C | 6.03383  | 4.57282  | 15.08073 |
| C | 4.78336  | 6.68127  | 14.93694 |
| C | 3.56416  | 8.80124  | 14.67520 |
| C | 2.32774  | 10.93290 | 14.56453 |
| C | 10.93525 | 0.29698  | 14.57900 |
| C | 9.70988  | 2.42993  | 14.68402 |
| C | 8.48879  | 4.56573  | 14.88152 |
| C | 7.27046  | 6.70612  | 15.31395 |
| C | 6.03383  | 8.81101  | 14.79167 |
| C | 4.79182  | 10.93235 | 14.62105 |
| C | 12.16790 | 2.42881  | 14.62140 |
| C | 10.93825 | 4.55588  | 14.67325 |
| C | 9.71205  | 6.68050  | 14.79981 |
| C | 8.47694  | 8.82490  | 14.77560 |
| C | 7.25064  | 10.94772 | 14.64113 |

|   |          |          |          |
|---|----------|----------|----------|
| C | 12.16797 | 6.68538  | 14.63308 |
| C | 10.93189 | 8.81049  | 14.64576 |
| C | 9.71237  | 10.94985 | 14.59681 |
| C | 12.16762 | 10.94479 | 14.55075 |
| C | 1.10971  | 1.71837  | 14.64024 |
| C | 3.56571  | 1.70150  | 14.77157 |
| C | 2.32764  | 3.85014  | 14.78414 |
| C | 1.10141  | 5.97336  | 14.65207 |
| C | 6.00379  | 1.71261  | 14.82850 |
| C | 4.76255  | 3.82345  | 15.35795 |
| C | 3.55049  | 5.96173  | 14.84595 |
| C | 2.33096  | 8.09777  | 14.63753 |
| C | 1.10571  | 10.23087 | 14.55739 |
| C | 8.47540  | 1.72500  | 14.72855 |
| C | 7.25624  | 3.84828  | 14.97808 |
| C | 6.00690  | 5.95747  | 15.06243 |
| C | 4.78924  | 8.08384  | 14.81668 |
| C | 3.56853  | 10.21752 | 14.61013 |
| C | 2.32926  | 12.35742 | 14.57919 |
| C | 10.93799 | 1.72476  | 14.61225 |
| C | 9.71290  | 3.85228  | 14.73056 |
| C | 8.50784  | 5.97038  | 14.95183 |
| C | 7.25775  | 8.13796  | 14.90813 |
| C | 6.02398  | 10.22822 | 14.66287 |
| C | 4.79013  | 12.35666 | 14.63623 |
| C | 12.17148 | 3.84389  | 14.63842 |
| C | 10.93952 | 5.97734  | 14.68571 |
| C | 9.71888  | 8.11272  | 14.76364 |

|   |          |          |          |
|---|----------|----------|----------|
| C | 8.47952  | 10.24098 | 14.65257 |
| C | 7.24848  | 12.37252 | 14.64426 |
| C | 12.17270 | 8.10022  | 14.61295 |
| C | 10.93753 | 10.24117 | 14.58772 |
| C | 9.71278  | 12.37391 | 14.59231 |
| C | 12.17364 | 12.36300 | 14.55393 |
| O | 4.70363  | 3.69022  | 16.87460 |
| H | 4.61258  | 4.62075  | 17.23102 |
| O | 7.33429  | 6.84626  | 16.92887 |
| H | 7.14316  | 5.92830  | 17.26202 |
| P | 4.34588  | 7.67861  | 18.72894 |
| O | 5.45701  | 8.38063  | 17.86893 |
| H | 6.22093  | 7.75636  | 17.51132 |
| O | 4.67605  | 6.06573  | 18.51549 |
| H | 4.55771  | 5.62380  | 19.39385 |
| O | 3.01320  | 7.94341  | 17.83153 |
| H | 2.23793  | 8.01390  | 18.44250 |
| O | 4.17341  | 8.01635  | 20.16228 |

## GO-Epoxy-OH-H<sub>3</sub>PO<sub>4</sub>

|   |               |               |               |
|---|---------------|---------------|---------------|
| C | 1.0981476925  | 0.5761819606  | 14.5879398421 |
| C | 3.5580861253  | 0.5799262209  | 14.6844160393 |
| C | 2.3256052649  | 2.7042703756  | 14.6756944000 |
| C | 1.0965252155  | 4.8346554503  | 14.6474253652 |
| C | 6.0174539232  | 0.5804839080  | 14.8075302100 |
| C | 4.7757225989  | 2.7129858277  | 14.9304211184 |
| C | 3.5489981691  | 4.8326701794  | 14.8112963237 |
| C | 2.3374006344  | 6.9566841194  | 14.6747524742 |
| C | 1.1058592306  | 9.0892579427  | 14.6201830766 |
| C | 8.4736932958  | 0.5764305751  | 14.7448665038 |
| C | 7.2529572439  | 2.6715253999  | 15.0403447630 |
| C | 5.9625091361  | 4.8477141742  | 15.3526546090 |
| C | 4.7994220992  | 6.9616232531  | 14.9040130416 |
| C | 3.5690363815  | 9.0943491062  | 14.6982656175 |
| C | 2.3311837749  | 11.2256467822 | 14.6039199192 |
| C | 10.9340006636 | 0.5741049324  | 14.6311259664 |
| C | 9.7100467076  | 2.7089095019  | 14.8057171198 |
| C | 8.5050755677  | 4.8536955133  | 15.0957640078 |
| C | 7.2488361593  | 6.9993797185  | 15.4882282111 |
| C | 6.0237748987  | 9.1056446668  | 14.8841166362 |
| C | 4.7914156680  | 11.2313067288 | 14.6993399851 |
| C | 12.1630636885 | 2.7077396239  | 14.6340544609 |
| C | 10.9360010316 | 4.8347462394  | 14.7552886328 |
| C | 9.7102857608  | 6.9623595730  | 14.9124063312 |
| C | 8.4684372720  | 9.1019000855  | 14.8945696350 |
| C | 7.2485295539  | 11.2284206010 | 14.7584241769 |

|   |               |               |               |
|---|---------------|---------------|---------------|
| C | 12.1676979839 | 6.9636860078  | 14.6844017126 |
| C | 10.9337249964 | 9.0866457227  | 14.7230183046 |
| C | 9.7065608865  | 11.2249985777 | 14.6794107124 |
| C | 12.1639240293 | 11.2240259043 | 14.5963390041 |
| C | 1.0952078966  | 1.9940538827  | 14.6117386023 |
| C | 3.5536339821  | 1.9966082301  | 14.7477606469 |
| C | 2.3224562541  | 4.1243517968  | 14.6895465721 |
| C | 1.1005218305  | 6.2524257157  | 14.6539883932 |
| C | 6.0223290956  | 1.9921291745  | 14.9553944993 |
| C | 4.7465833570  | 4.1125963330  | 15.0137350135 |
| C | 3.5553850737  | 6.2511967309  | 14.7770393656 |
| C | 2.3305922521  | 8.3835684066  | 14.6526547282 |
| C | 1.1003625025  | 10.5142336572 | 14.5951514459 |
| C | 8.4713743379  | 1.9929965833  | 14.8528113353 |
| C | 7.2729667777  | 4.0987378480  | 15.3670846225 |
| C | 5.9800195161  | 6.2845548564  | 15.1678407653 |
| C | 4.7881981304  | 8.3955505648  | 14.8314007272 |
| C | 3.5616050627  | 10.5183732224 | 14.6574788295 |
| C | 2.3274213323  | 12.6479634896 | 14.6080810128 |
| C | 10.9295773272 | 2.0013714553  | 14.6758131293 |
| C | 9.7129139636  | 4.1295142213  | 14.8699586092 |
| C | 8.4980701299  | 6.2432027784  | 15.1173278410 |
| C | 7.2487900642  | 8.4231334325  | 15.0405120522 |
| C | 6.0196272344  | 10.5218760497 | 14.7672719429 |
| C | 4.7886047267  | 12.6499062199 | 14.7221889901 |
| C | 12.1642252020 | 4.1243792410  | 14.6582628411 |
| C | 10.9347410650 | 6.2571656970  | 14.7744026992 |
| C | 9.7118154460  | 8.3841812901  | 14.8656331660 |



|   |               |               |               |
|---|---------------|---------------|---------------|
| C | 8.4727471138  | 10.5172645202 | 14.7579290049 |
| C | 7.2472164475  | 12.6508852903 | 14.7650997125 |
| C | 12.1662100451 | 8.3797585439  | 14.6680922614 |
| C | 10.9341247354 | 10.5151517967 | 14.6580426785 |
| C | 9.7050447845  | 12.6444239858 | 14.6676326319 |
| C | 12.1604903328 | 12.6439584508 | 14.5853238241 |
| O | 7.3127742604  | 7.1165579814  | 17.0584679808 |
| H | 7.2511397784  | 6.1553056350  | 17.3442294021 |
| O | 6.6141468970  | 4.4121406686  | 16.7126403480 |
| P | 4.2355337011  | 6.6808606910  | 18.6189759069 |
| O | 5.3857233113  | 5.6112218889  | 19.0668461429 |
| H | 5.4144288865  | 4.8618042029  | 18.4153999439 |
| O | 3.2037678590  | 6.0845708371  | 17.7247239677 |
| O | 5.0299099420  | 7.9578863577  | 18.1087558244 |
| H | 5.9376876894  | 7.6965960486  | 17.6858024756 |
| O | 3.6646440553  | 7.2457581780  | 20.0237971841 |
| H | 2.8410119464  | 6.7500153728  | 20.2561346778 |

## GO-P-O-C

|   |          |          |          |
|---|----------|----------|----------|
| C | 0.74553  | 0.36553  | 14.73214 |
| C | 3.20387  | 0.35575  | 14.87683 |
| C | 1.97238  | 2.48567  | 14.65993 |
| C | 0.73908  | 4.62645  | 14.52975 |
| C | 5.66879  | 0.35634  | 14.82550 |
| C | 4.42911  | 2.46488  | 14.65784 |
| C | 3.20454  | 4.60840  | 14.63198 |
| C | 1.98018  | 6.75376  | 14.68808 |
| C | 0.75133  | 8.88483  | 14.72147 |
| C | 8.12571  | 0.36837  | 14.70699 |
| C | 6.88243  | 2.48027  | 14.43742 |
| C | 5.57477  | 4.43529  | 13.86403 |
| H | 5.44349  | 5.33419  | 13.27454 |
| C | 4.29264  | 6.75965  | 15.39261 |
| C | 3.20825  | 8.87350  | 14.94741 |
| C | 1.98089  | 11.00876 | 14.85504 |
| C | 10.58510 | 0.37616  | 14.64704 |
| C | 9.34186  | 2.49778  | 14.40412 |
| C | 8.09269  | 4.62925  | 14.09967 |
| C | 6.95975  | 6.85522  | 14.38154 |
| H | 6.00847  | 6.40045  | 14.23554 |
| C | 5.68172  | 8.86560  | 15.05429 |
| C | 4.44228  | 11.00712 | 15.01525 |
| C | 11.81131 | 2.49641  | 14.51524 |
| C | 10.57470 | 4.63176  | 14.33246 |
| C | 9.36145  | 6.76682  | 14.39214 |

C 8.15287 8.90286 14.75480  
C 6.90579 11.01019 14.92017  
C 11.82434 6.76108 14.47435  
C 10.59652 8.89094 14.63110  
C 9.36716 11.02626 14.78245  
C 11.82183 11.02003 14.74230  
C 0.74092 1.78454 14.63613  
C 3.19802 1.77167 14.78230  
C 1.97334 3.91237 14.60589  
C 0.75403 6.04848 14.51916  
C 5.66345 1.76384 14.63481  
C 4.41542 3.85890 14.39749  
C 3.19692 6.02598 14.87884  
C 1.98055 8.17140 14.79510  
C 0.75085 10.30503 14.77610  
C 8.11930 1.78375 14.52651  
C 6.85274 3.86787 14.08285  
C 4.43253 8.15351 15.16447  
C 3.21223 10.29666 14.94378  
C 1.97493 12.43054 14.83840  
C 10.57718 1.79265 14.51495  
C 9.32524 3.92628 14.25111  
C 8.11790 6.07986 14.23476  
C 6.92452 8.19089 14.76381  
C 5.67588 10.28239 15.02592  
C 4.44088 12.42464 14.93713  
C 11.80612 3.92233 14.45023  
C 10.59063 6.05457 14.36922

C 9.36444 8.18265 14.58112  
C 8.14485 10.31544 14.85295  
C 6.89946 12.42712 14.83075  
C 11.82523 8.18034 14.59147  
C 10.59353 10.30961 14.72605  
C 9.35847 12.44571 14.72187  
C 11.81563 12.44181 14.71537  
O 6.43785 5.26181 18.18979  
O 3.99274 5.90479 18.35114  
O 5.23907 6.02675 16.17916  
O 5.78870 7.80388 18.08200  
P 5.40152 6.41540 17.74564  
H 7.34446 5.65014 18.27113  
H 3.75304 6.46134 19.13366

## GO-P-C

|   |          |          |          |
|---|----------|----------|----------|
| C | 0.81754  | 0.38953  | 14.52334 |
| C | 3.27474  | 0.38358  | 14.69383 |
| C | 2.04590  | 2.51805  | 14.51158 |
| C | 0.81281  | 4.65309  | 14.42767 |
| C | 5.73423  | 0.38167  | 14.69965 |
| C | 4.50105  | 2.50718  | 14.56563 |
| C | 3.27074  | 4.65544  | 14.62282 |
| C | 2.04519  | 6.77987  | 14.63921 |
| C | 0.82001  | 8.91119  | 14.58110 |
| C | 8.19087  | 0.38437  | 14.57290 |
| C | 6.95443  | 2.51047  | 14.41185 |
| C | 5.68183  | 4.54613  | 14.00363 |
| H | 5.61499  | 5.54094  | 13.57489 |
| C | 4.32282  | 6.78501  | 15.54122 |
| C | 3.27321  | 8.90226  | 14.89080 |
| C | 2.05104  | 11.03510 | 14.67365 |
| C | 10.65281 | 0.39209  | 14.46146 |
| C | 9.41423  | 2.51659  | 14.33064 |
| C | 8.17589  | 4.65507  | 14.26246 |
| C | 7.07630  | 6.79896  | 14.88898 |
| H | 6.19348  | 6.23423  | 15.12397 |
| C | 5.73441  | 8.88752  | 15.16279 |
| C | 4.50772  | 11.03197 | 14.89896 |
| C | 11.88373 | 2.51952  | 14.37324 |
| C | 10.65082 | 4.65518  | 14.29374 |
| C | 9.44005  | 6.78765  | 14.42734 |

C 8.20560 8.91314 14.74128  
C 6.96531 11.02855 14.82995  
C 11.89680 6.78614 14.36883  
C 10.65963 8.91505 14.50458  
C 9.42661 11.04208 14.61051  
C 11.88998 11.04333 14.53680  
C 0.81526 1.81036 14.45856  
C 3.27093 1.80243 14.62687  
C 2.04545 3.94556 14.50941  
C 0.82579 6.07415 14.42508  
C 5.73065 1.79594 14.54724  
C 4.49620 3.92173 14.40756  
C 3.24624 6.06065 14.91395  
C 2.04353 8.20014 14.71507  
C 0.81966 10.33191 14.59336  
C 8.18835 1.80444 14.44731  
C 6.93400 3.92125 14.18744  
C 4.46913 8.18816 15.23275  
C 3.27836 10.32385 14.81823  
C 2.04621 12.45637 14.63498  
C 10.64890 1.81025 14.37210  
C 9.40545 3.94707 14.26701  
C 8.20756 6.08178 14.49072  
C 6.99507 8.18727 14.97686  
C 5.73658 10.30232 14.98692  
C 4.50730 12.44898 14.78433  
C 11.88143 3.94522 14.34960  
C 10.66420 6.07734 14.31769

C 9.42709 8.20440 14.54964  
C 8.20243 10.33066 14.74106  
C 6.96228 12.44584 14.70868  
C 11.89125 8.20526 14.46235  
C 10.65783 10.33329 14.54798  
C 9.42292 12.46100 14.54780  
C 11.88610 12.46311 14.50362  
O 5.51530 4.77539 16.99880  
O 3.55324 5.95872 18.00235  
O 5.80902 7.26830 17.84169  
P 4.93032 6.27898 17.16559  
H 5.84466 4.44150 17.87146  
H 3.32350 6.75586 18.54294

## References:

- (1) Shinotsuka, H.; Tanuma, S.; Powell, C. J.; Penn, D. R. Calculations of Electron Inelastic Mean Free Paths . X . Data for 41 Elemental Solids over the 50 eV to 200 KeV Range with the Relativistic Full Penn Algorithm. *Surf. Interface Anal* **2015**, *47*, 2015. <https://doi.org/10.1002/sia.5861>.
- (2) Quases-IMFP code written by Sven Tougaard, copyright 2000-2016. Quases-Tougaard Inc.; free to use for non-commercial applications.
- (3) Scofield, J. H. Hartree-Slater Subshell Photoionization Cross-Sections at 1254 and 1487 eV. *J. Electron Spectros. Relat. Phenomena* **1976**, *8*, 129–137. [https://doi.org/https://doi.org/10.1016/0368-2048\(76\)80015-1](https://doi.org/https://doi.org/10.1016/0368-2048(76)80015-1).
- (4) Wagner, C. D.; Raymond, R. H.; Gale, L. H. Empirical Atomic Sensitivity Factors for Quantitative Analysis by Electron Spectroscopy for Chemical Analysis. *Surf. Interface Anal.* **1981**, *3* (5), 211–225. <https://doi.org/https://doi.org/10.1002/sia.740030506>.
- (5) Giannozzi, P.; Baroni, S.; Bonini, N.; Calandra, M.; Car, R.; Cavazzoni, C.; Ceresoli, D.; Chiarotti, G. L.; Cococcioni, M.; Dabo, I.; Corso, A. D.; Gironcoli, S. De; Fabris, S.; Fratesi, G.; Gebauer, R.; Gerstmann, U.; Gougoussis, C.; Kokalj, A.; Lazzeri, M.; Martin-samos, L.; Marzari, N.; Mauri, F.; Mazzarello, R.; Paolini, S.; Pasquarello, A.; Paulatto, L.; Sbraccia, C. QUANTUM ESPRESSO : A Modular and Open-Source Software Project for Quantum Simulations of Materials. *J. Phys. Condens. Matter* **2009**, *21*, 1–19. <https://doi.org/10.1088/0953-8984/21/39/395502>.
- (6) Perdew, J. P.; Burke, K.; Ernzerhof, M. Generalized Gradient Approximation Made Simple. *Phys. Rev. Lett.* **1996**, *77* (3), 3865–3868.
- (7) Souza, F. A. L. de; Ambrozio, A. R.; Souza, E. S.; Cipriano, D. F.; Scopel, W. L.; Freitas, J. C. C. NMR



- Spectral Parameters in Graphene, Graphite, and Related Materials: Ab Initio Calculations and Experimental Results. *J. Phys. Chem. C* **2016**, *120*, 27707–27716. <https://doi.org/10.1021/acs.jpcc.6b10042>.
- (8) Vignoles, L.; Ambrozio, A. R.; Leyssale, J.; Pellenq, R. J.; Scopel, W. L.; Freitas, J. C. C. <sup>13</sup>C NMR Parameters of Disordered Carbons: Atomistic Simulations, DFT Calculations, and Experimental Results. *J. Phys. Chem. C* **2020**, *124*, 12784–12973. <https://doi.org/10.1021/acs.jpcc.0c02921>.
- (9) Grimme, S.; Ehrlich, S.; Goerigk, L. Effect of the Damping Function in Dispersion Corrected Density Functional Theory. *J. Comput. Chem. Comput. Chem.* **2011**, *32*, 1456–1465. <https://doi.org/10.1002/jcc>.
- (10) Pickard, C. J.; Mauri, F. All-Electron Magnetic Response with Pseudopotentials: NMR Chemical Shifts. *Phys. Rev. B* **2001**, *63*, 245101. <https://doi.org/10.1103/PhysRevB.63.245101>.
- (11) P. E. Blochl. Projector Augmented-Wave Method. *Phys. Rev. B* **1994**, *50* (24), 17953. <https://doi.org/https://doi.org/10.1103/PhysRevB.63.245101>.
- (12) Bonhomme, C.; Gervais, C.; Babonneau, F.; Coelho, C.; Pourpoint, F.; Azais, T.; Ashbrook, S. E.; Griffin, J. M.; Yates, J. R.; Mauri, F.; Pickard, C. J. First-Principles Calculation of NMR Parameters Using the Gauge Including Projector Augmented Wave Method: A Chemists Point of View. *Chem. Rev.* **2012**, *112* (11), 5733–5779. <https://doi.org/10.1021/cr300108a>.
